1 Effects of genome size on pollen performance

2

3

4

5 How does genome size affect the evolution of pollen tube growth rate, a haploid  
6 performance trait?

7

8

9

10

11 John B. Reese<sup>1,2</sup> and Joseph H. Williams<sup>2</sup>

12 Department of Ecology and Evolutionary Biology, University of Tennessee, Knoxville, TN

13 37996, U.S.A.

14

15

16

17 <sup>1</sup>Author for correspondence:

18 John B. Reese

19 Tel: 865 974 9371

20 Email: [jreese11@vols.utk.edu](mailto:jreese11@vols.utk.edu)

21

22  
23  
24  
25  
26  
27  
28  
29  
30  
31  
32  
33  
34  
35  
36  
37  
38  
39  
40  
41  
42  
43  
44

## ABSTRACT

**Premise of the Study** – Male gametophytes of most seed plants deliver sperm to eggs via a pollen tube. Pollen tube growth rates (*PTGRs*) of angiosperms are exceptionally rapid, a pattern attributed to more effective haploid selection under stronger pollen competition. Paradoxically, whole genome duplication (WGD) has been common in angiosperms but rare in gymnosperms. Pollen tube polyploidy should initially accelerate *PTGR* because increased heterozygosity and gene dosage should increase metabolic rates, however polyploidy should also independently increase tube cell size, causing more work which should decelerate growth. We asked how genome size changes have affected the evolution of seed plant *PTGRs*.

**Methods** - We assembled a phylogenetic tree of 451 species with known *PTGRs*. We then used comparative phylogenetic methods to detect effects of neo-polyploidy (within-genus origins), DNA content, and WGD history on *PTGR*, and correlated evolution of *PTGR* and DNA content.

**Key Results** - Gymnosperms had significantly higher DNA content and slower *PTGR* optima than angiosperms, and their *PTGR* and DNA content were negatively correlated. For angiosperms, 89% of model weight favored Ornstein-Uhlenbeck models with a faster *PTGR* optimum for neo-polyploids, but *PTGR* and DNA content were not correlated. In comparisons of within-genus and intraspecific-cytotype pairs, *PTGRs* of neo-polyploids  $\leq$  paleo-polyploids.

**Conclusions** – Genome size increases should negatively affect *PTGR* when genetic consequences of WGDs are minimized, as found in intra-specific autopolyploids (low heterosis) and gymnosperms (few WGDs). But in angiosperms, the higher *PTGR* optimum of neo-polyploids and non-negative *PTGR*-DNA content correlation suggest that recurrent WGDs have caused substantial *PTGR* evolution in a non-haploid state.

45        **Keywords:** DNA content, evolution of development, gametophyte, macroevolution, pollen  
46        competition, pollen tube growth rate, polyploidy, whole genome duplication.

47

48

49

## INTRODUCTION

50           In seed plants, the male gametophyte is a highly-reduced, haploid organism that develops  
51 within the pollen grain and completes its life cycle after pollination by growing a pollen tube that  
52 invades female reproductive tissues. The pollen tube functions to attach the male gametophyte  
53 and to absorb nutrients from female tissues, and in most seed plants (conifers, Gnetales, and  
54 angiosperms), it has the novel function of transporting the sperm cells to the egg-bearing female  
55 gametophyte (siphonogamy) (Friedman, 1993). Pollen tube growth rate (*PTGR*) is a central  
56 aspect of male gametophyte performance that can evolve due to changes in the time between  
57 pollination and fertilization, and due to changes in the intensity of pollen tube competition.  
58 Strikingly, angiosperms are known to have much shorter reproductive cycles (Williams and  
59 Reese, 2019), much higher potential for pollen competition (Mulcahy, 1979), and orders of  
60 magnitude faster *PTGRs* (Williams, 2012) relative to gymnosperms. The pattern of exceptionally  
61 fast angiosperm *PTGRs* is thought to have evolved rapidly via haploid selection on pollen-  
62 expressed genes (Mulcahy, 1979; Arunkumar et al., 2013; Otto et al., 2015), which constitute a  
63 large portion of the genome (Tanksley et al., 1981; Rutley and Twell, 2015; Hafidh et al., 2016).

64           If the dramatic and rapid acceleration of *PTGRs* in angiosperms has been driven by  
65 haploid selection on pollen performance genes, then one might expect polyploidy to be rare in  
66 angiosperms. Evolution above the haploid level is expected to reduce the efficiency of selection  
67 on pollen (Otto et al., 2015). Yet, the opposite is true – ancient whole genome duplications  
68 (WGDs), recent polyploids, and speciation by polyploidy have been especially common in  
69 angiosperms, whereas in gymnosperms genome size has evolved largely by other processes  
70 (Wood et al., 2009; Mayrose et al., 2011; Leitch & Leitch, 2012, 2013; Landis et al., 2018). In  
71 fact, large changes genome size can have a number of immediate effects on *PTGR*. First, *PTGR*

72 might be faster in a neo-diploid pollen tube since increases in gene number cause: 1) heterosis,  
73 due to sheltering of deleterious pollen-expressed alleles and/or new allelic interactions upon loss  
74 of haploidy (Lande and Schemske, 1985; Husband and Schemske, 1997; Comai, 2005; Birchler  
75 et al. 2010; Husband, 2016), and 2) gene dosage effects, due to increased capacity for protein  
76 synthesis and hence the possibility for higher metabolic rates (Stebbins, 1974; Comai, 2005;  
77 Conant and Wolfe, 2008). On the other hand, substantial increases in DNA content (whether by  
78 WGD or other processes) are known to increase nuclear size, cell size, and the duration of the  
79 cell cycle, independent of the effects of genes (Bennett, 1971, 1972; Cavalier-Smith, 1978; Price  
80 1988; Cavalier-Smith, 2005). The phenotypic effects of increased bulk DNA, hereafter referred  
81 to as “nucleotypic” effects (Bennett, 1971; Snodgrass et al, 2016; Doyle & Coate, 2019), cause  
82 more work for the growing pollen tube cell and should therefore negatively affect *PTGR*,  
83 counteracting the positive “genotypic” effects of heterozygosity and gene dosage.

84 As shown in Figure 1, if genome size expansion occurs without increasing the number of  
85 genes, then nucleotypic effects will predominate and slower *PTGRs* should evolve. But if  
86 genome size increase occurs by WGD, then altered gene expression patterns (due to dosage and  
87 heterozygosity effects) should counteract nucleotypic effects in the stabilized neo-polyploid (Fig.  
88 1). In the latter case, the balance of nucleotypic and genotypic effects varies depending on the  
89 magnitude of potential heterosis, which depends directly on the amount of standing genetic  
90 variation (Birchler et al. 2010). In general, at inception tetraploid sporophytes are expected to  
91 have higher heterozygosity than their diploid progenitors, irrespective of mode of  
92 polyploidization (auto- to allo-polyploidy) or mating system (Lande and Schemske 1985; Soltis  
93 and Soltis 2000). Thus, at inception, autopolyploids that arise from outcrossing progenitors and

94 allopolyploids will have a higher potential for heterosis, relative to autopolyploids that arose  
95 from selfing ancestors (Fig. 1).

96         After the initial effects of WGD, genotypic effects continue to evolve under both  
97 stabilizing and directional selection on *PTGR*, mediated by shifts in mating system and  
98 phenomena such as genome downsizing, biased gene retentions, recombination, and ultimately  
99 the return to disomic inheritance (Conant and Wolfe, 2008; De Smet et al. 2013; Conant et al.,  
100 2014; Freeling et al., 2015; Dodsworth et al., 2016; Panchy et al. 2016; Wendel et al., 2018).  
101 Nucleotypic effects by definition can only evolve by changes in genome size, which after WGD  
102 tend to be biased to small losses relative to the size of the WGD (Dodsworth et al. 2016). Hence,  
103 with time, genotypic effects are predicted to overwhelm nucleotypic effects, irrespective of  
104 initial effects and the direction of *PTGR* evolution.

105         In this study, we used model-based comparative phylogenetic analyses to determine if  
106 polyploidy, DNA C-value, and WGD history have affected the evolution of *PTGRs* in seed  
107 plants, and whether genome size effects have occurred predominantly during polyploid periods  
108 of history or during subsequent periods of more or less diploid evolution. Because all seed plants  
109 have at least one WGD in their history, we defined neo-polyploids as having a higher  
110 chromosome multiple than the base chromosome number of their genus, and paleo-polyploids  
111 (hereafter, “diploids”) as having similar chromosome number as the genus base number (as in  
112 Wood et al. 2009; Mayrose et al. 2011). This allowed us to determine if, 1) neo-polyploids have  
113 faster *PTGRs* than diploids, as predicted if WGDs generally produce strong initial genotypic  
114 effects that persist in the polyploid condition, or 2) neo-polyploids have slower *PTGRs* than  
115 diploids, as predicted if nucleotypic effects initially outweigh genotypic effects and if fast  
116 *PTGRs* generally evolve after diploidization (eg. in paleopolyploids). We also predict an

117 underlying negative correlation between *PTGR* and genome size due to nucleotypic effects,  
118 which should be most apparent in intraspecific neo-polyploids and in lineages with little history  
119 of WGD.

120

## 121 MATERIALS AND METHODS

122 ***Tree Construction and Dating*** – GenBank accessions for 16 gene regions (*rbcL*, *matK*, *trnL-F*,  
123 *18s\_rDNA*, *atpB*, *ndhF*, *adh*, *trnL*, *rpl32*, *trnT-L*, *psbA-trnH*, *rpl32-trnL*, *ITS*, *5.8s\_rRNA*, *rps16*,  
124 and *26s\_rDNA*) for 451 seed plant species with pollen tube growth rate data were retrieved,  
125 cleaned, and assembled into a multiple gene alignment (length – 9263 base pairs, 16 partitions,  
126 69.6% missing data) using PHLAWD and phyutility (Smith and Donoghue, 2008; Smith and  
127 Dunn, 2008). Tree inference was performed using maximum likelihood in RAxML version 8  
128 (Stamatakis, 2014) on CIPRES. A pruned version of the seed plant tree from Magallón et al.  
129 (2015) was used as a guide tree to enforce topology of major clades. The resulting maximum  
130 likelihood estimate of the tree was rooted and ultrametricized using the *ape* (Paradis et al., 2004)  
131 and *geiger* packages in R (Harmon et al., 2008). Time-calibration was performed with the  
132 Congruification method (Eastman et al., 2013), using the Magallón et al. (2015) phylogeny as the  
133 reference tree.

134 ***Data collection and character scoring*** – Data on *PTGRs* were taken from Williams  
135 (2012) and more recent literature (cited in Appendix S1; see the Supplementary Data with this  
136 article). The *PTGR* value used for each species represents an estimate of maximum sustained  
137 growth rate, which is consistent with other comparative analyses of physiological traits, and with  
138 the fact that researchers almost always measure *PTGRs* from the longest pollen tube(s). Thus,  
139 *PTGR* values for each species represent an average of maximum in vivo growth rates, or if there

140 was more than one report for a species the average of those values (as in Williams, 2012).  
141 *PTGRs* were taken exclusively from within-ploidy level crosses (i.e., never from inter-ploid  
142 crosses), in keeping with our overall goal of finding mechanisms underlying the pattern of *PTGR*  
143 evolution within stabilized polyploids.

144 DNA content was analyzed using 1C-value: the amount of nuclear DNA in the  
145 unreplicated gametic nucleus, irrespective of ploidy level (Swift, 1950; Bennett and Leitch,  
146 2012). As we were primarily interested in the nucleotypic effects of bulk DNA amount, we use  
147 the terms C-value, DNA content, and genome size interchangeably throughout. C-value data was  
148 collected from the Kew Royal Botanic Gardens Plant C-value Database (Bennett and Leitch,  
149 2012). Chromosome counts were obtained from the Index to Plant Chromosome Numbers  
150 (IPCN). To examine the effect of recent polyploidy (defined as occurring at or within the genus  
151 level; Wood et al., 2009; Mayrose et al., 2011) on *PTGR*, we scored taxa as “neo-polyploid” if  
152 their chromosome counts were  $\geq 1.5$  times that of their generic 1x base count (from Wood et al.,  
153 2009) and “diploid” (paleo-polyploid) if  $< 1.5$  times that value ( $N = 206$  angiosperms, 23  
154 gymnosperms). To examine the effect of ancient (deeper than genus-level) duplication events on  
155 *PTGR*, the number of WGDs in each genus-to-root lineage was counted for each angiosperm  
156 (found in Appendix S1 of Landis et al. 2018) and gymnosperm (Li et al. 2015).

157 ***Phylogenetic Comparative Analyses*** - To visualize changes in DNA content and *PTGR*  
158 along tree branches and to generate estimates of node states, ancestral state reconstructions were  
159 performed and plotted using the contMap function in *phytools* (Felsenstein, 1985; Revell,  
160 2012)(Appendix S2). Given many known biological differences between gymnosperms and  
161 angiosperms in pollen tube growth (Friedman, 1993; Williams, 2008) and in mechanisms of  
162 genome size change (see Discussion) (Ohri and Khoshoo, 1986; Leitch et al., 1998), all



163 comparative analyses were performed on gymnosperms only, angiosperms only, and the full  
164 dataset (all spermatophytes). C-value and *PTGR* were log<sub>10</sub>-transformed for all analyses.

165 Model-based analyses were used to examine patterns of *PTGR* and C-value evolution  
166 separately. The *OUwie* function was implemented in R (Beaulieu and O'Meara, 2014), and the  
167 following models were tested: single- and multi-rate Brownian motion (BM1, BMS,  
168 respectively), single-regime Ornstein-Uhlenbeck (OU1), and multi-regime OU models with  
169 either one global  $\alpha$  and  $\sigma^2$  estimate (OUM), one  $\alpha$  and multiple  $\sigma^2$  (OUMV), or multiple  $\alpha$  and  
170 one  $\sigma^2$  (OUMA). In all models,  $\sigma^2$  represents the rate of random evolution and  $\alpha$ , the strength of  
171 attraction to an optimum,  $\theta$ . The single- and multiple-regime models were compared to test  
172 whether or not, 1) angiosperms and gymnosperms evolve around different *PTGR* or C-value  
173 optima, and 2) diploids and neo-polyploids (within all three groups) evolve around different  
174 *PTGR* or C-value optima. For all analyses, AICc values were used to calculate model weights  
175 and the weighted average of parameter values was then calculated using all models that  
176 contributed > 1% of the model weight (Burnham & Anderson, 2002). Unless otherwise noted, all  
177 measures of uncertainty around parameter estimates are standard errors.

178 Since each *PTGR* value represents a species mean obtained from multiple measurements,  
179 we attempted to incorporate error into phylogenetic comparative analyses. Since species means  
180 were log<sub>10</sub>-transformed for analysis, log<sub>10</sub>-transformed *SEs* are also required. As there is no  
181 reliable way to calculate the log<sub>10</sub>-transformed *SE* from the literature without the original data for  
182 each species, we took the following approach. First, we assumed all species had similar *SEs* in  
183 *PTGR*, and we applied an empirically-determined *SE* from an exemplar species to all. *Magnolia*  
184 *grandiflora* has an average *PTGR* of  $828 \pm 141 \mu\text{m h}^{-1}$  ( $N = 25$  outcrosses), close to the  
185 angiosperm median of  $587 \mu\text{m h}^{-1}$  (Williams, 2012 and this study) (Appendix S3). The standard

186 deviation (*SD*) of log<sub>10</sub>-transformed data was calculated and divided by the mean of the log<sub>10</sub>-  
187 transformed data to acquire a coefficient of variation (*CV*) of 0.0237. We then multiplied the  
188 log<sub>10</sub>-transformed mean *PTGR* of each species by 0.0237 to provide an estimate of the log<sub>10</sub>  
189 taxon-specific standard deviation. The standard deviation (*SD*) was used as a conservative  
190 estimate of error because sample sizes were generally not available for calculating *SE*. Secondly,  
191 we performed a sensitivity analysis by evaluating each evolutionary model in *OUwie* with *SDs*  
192 calculated from hypothetical global *CVs* of 0.00, 0.05, 0.10, 0.25, and 0.50 (Appendix S4).

193 The association between recent polyploidy and *PTGR* was also assessed among 10  
194 diploid-polyploid near-relative pairs (appearing as sister taxa on the tree at the within-genus  
195 level). Only polyploid taxa with a single diploid sister on the tree were used. The *PTGRs* of 11  
196 intraspecific diploid-autopolyploid pairs from the literature were also compared. A two-tailed  
197 binomial (sign) test was used to test significance in both.

198 The cumulative effect of ancient polyploid events was explored with phylogenetic  
199 generalized least squares (*PGLS*) regression using the *phylolm* package in R (Ho & Ane, 2014).  
200 The number of ancient duplication events in the history of each tip taxon (inferred from Landis et  
201 al., 2018) was used as the predictor variable with *PTGR* as the response variable.

202 The relationship between pollen tube growth rate and gametophytic DNA content was  
203 also assessed with *PGLS* regression. Gametophytic DNA content was used as the predictor  
204 variable and *PTGR* the response variable. BM (Grafen, 1989) and OU (Martins and Hansen,  
205 1997) models were both used, in addition to Pagel's lambda, kappa, and delta models (Pagel,  
206 1997, 1999). To examine the effect of ploidy and the interaction between ploidy and C-value on  
207 *PTGR*, a phylogenetic ANCOVA was implemented with C-value as the covariate in *phylolm*.

208 Shifts among convergent *PTGR* and C-value optima were determined with a maximum  
209 likelihood approach to detect multiple optima within seed plants, using *SURFACE* in R (Ingram  
210 and Mahler, 2013). Using an OU model with a global  $\alpha$  and  $\sigma^2$ , a single-optimum model was  
211 subdivided into multiple-optima models in a stepwise fashion until adding another optimum  
212 decreased the model likelihood by  $\Delta\text{AIC} > -2$ . Separate optima were then collapsed (i.e. two  
213 regimes were assigned the same optimum) in a pairwise fashion until further collapses decreased  
214 model likelihood. Shifts in *PTGR* and C-value optima that occurred at the same node, or within  
215 two nodes of each other, were identified manually. Nodes with *PTGR* or C-value regime shifts  
216 were also manually compared to the Landis et al. (2018) WGD map to see if a WGD had  
217 occurred at that node or up to two nodes *prior* to the regime shift.

218

219

## RESULTS

220 ***PTGR evolution and C-value evolution in angiosperms versus gymnosperms*** – The *PTGR* tree  
221 comprised 451 seed plants, with 28 species from 7 of 8 gymnosperm orders (Christenhusz et al.  
222 2011) including Cycads, *Ginkgo*, conifers and Gnetales; and 423 species from 38 of 64 (59%) of  
223 angiosperm orders (APG IV 2016), including representatives from all three ANA grade lineages,  
224 Chloranthaceae, eumagnoliids, and a broad distribution of both monocots and eudicots (full tree  
225 in Appendix S2). Gymnosperm *PTGR*s ranged from  $< 1$  to  $19 \mu\text{m h}^{-1}$  (mean  $\pm$  *SD* =  $3.29 \pm 4.34$ ,  
226 median =  $1.49 \mu\text{m h}^{-1}$ ), whereas angiosperm *PTGR*s ranged from  $< 5$  to  $> 30,000 \mu\text{m h}^{-1}$  (mean  $\pm$   
227 *SD* =  $1744 \pm 3576 \mu\text{m h}^{-1}$ , median =  $587 \mu\text{m h}^{-1}$ ). The maximum likelihood (ML) reconstruction  
228 indicated that ancestral  $\log_{10}$  *PTGR* of extant angiosperms was  $2.44 \mu\text{m h}^{-1}$  (95% CI: 1.09-3.69)  
229 versus  $0.215 \mu\text{m h}^{-1}$  (95% CI: -1.48-1.92) for extant gymnosperms (Appendix S2).

230 Model-based analyses of seed plant *PTGRs* and C-values favored OU models with  
231 separate optima for angiosperms and gymnosperms, accounting for > 99.9 % of the model  
232 weight in both analyses (Appendix S5, S6).  $\log_{10}$  *PTGR* optima were more than an order of  
233 magnitude faster in angiosperms ( $2.69 \pm 0.048 \mu\text{m h}^{-1}$ ) than in gymnosperms ( $0.187 \pm 0.123 \mu\text{m}$   
234  $\text{h}^{-1}$ ).

235 The C-value tree included 183 species from the *PTGR* tree for which DNA content data  
236 could be obtained. The resulting  $\log_{10}$  C-value optimum for angiosperms ( $0.184 \pm 0.051 \text{ pg}$ ) was  
237 more than a magnitude of order smaller than that of gymnosperms ( $1.231 \pm 0.041 \text{ pg}$ ). Ancestral  
238  $\log_{10}$  DNA content was also smaller for angiosperms than for gymnosperms,  $0.29 \text{ pg}$  (95% CI: -  
239  $0.45$ - $1.04$ ) versus  $1.10 \text{ pg}$  (95% CI:  $-0.28$ - $2.47$ ), consistent with larger comparative analyses of  
240 DNA content (see Leitch and Leitch, 2013).

241 ***Joint evolution of PTGR and ploidy*** – In model-based analyses of angiosperms using the  
242 empirical error rate, 89% of the model weight favored a separate and higher optimum for neo-  
243 polyploids ( $N = 68$ ) than for diploids ( $N = 138$ ) (model averaged  $\log_{10}$  *PTGR* =  $3.2 \pm 0.23$  vs.  $2.8$   
244  $\pm 0.08 \mu\text{m h}^{-1}$ ; Table 2). In the sensitivity analysis, OU models with separate and faster *PTGR*  
245 optima for neo-polyploids than diploids received > 50% of model weight when the error  
246 calculated from CVs ranged from 0 to 25 %, but above 25% single-regime and BM models had  
247 the majority of the weight (Appendix S4). These are conservative results, since *SDs*, not *SEs*,  
248 were used to model error on the tree. The gymnosperm-only analysis was not performed due to  
249 low sample size (2 of 23 species were polyploid).

250 A survey of intraspecific cytotypes found autopolyploids had slower *PTGR* than diploids  
251 in 9 of 11 pairs and no difference in the remaining two (Binomial test,  $P = 0.002$ ; Appendix  
252 S7b). In the nearest-relative comparisons, within-genus polyploids had slower *PTGR* than

253 diploids in four pairs, faster *PTGR* in five, and no difference in one (Two-tailed binomial test,  $P$   
254 = 0.623)(Appendix S7a).

255 The historical effect of number of ancient genome duplications on *PTGR* was non-  
256 significant, whether or not recent (within-genus) WGDs were included (kappa model weight >  
257 99.9%,  $N = 451$ ;  $P > 0.3$  in both analyses).

258 ***Joint evolution of PTGR, DNA content and ploidy*** - For seed plants, ordinary least  
259 squares (*OLS*) regression showed a significant negative correlation between DNA content and  
260 *PTGR* ( $N = 183$ ,  $P < 0.0001$ ), but that result was clearly driven by the large DNA contents and  
261 slow *PTGRs* of gymnosperms relative to angiosperms (Fig. 2), because the *PGLS* regression was  
262 non-significant (Table 1). Taking these two clades separately, DNA content was negatively  
263 correlated with *PTGR* in gymnosperms in the *PGLS* regression ( $N = 23$ ; model-averaged slope: -  
264  $1.09 \pm 0.49 \log_{10} PTGR$ ; Table 1). In angiosperms, a positive correlation using *OLS* ( $N = 161$ ;  
265  $P = 0.0005$ ), was non-significant using *PGLS* (Table 1). The patterns of *PTGR* and C-value  
266 evolution in seed plants can be visualized in Figure 3. In a smaller phylogenetic ANCOVA  
267 analysis, after controlling for C-value, the effect of ploidy on *PTGR* was non-significant in  
268 angiosperms ( $N = 100$ ) and seed plants ( $N = 118$ ) (non-significant ploidy x C-value interaction  
269 removed; Appendix S8).

270 ***Coincident regime shifts in PTGR and DNA content*** – Maximum likelihood analysis of  
271 convergent evolution of *PTGRs* detected 13 distinct optima ( $N = 451$  taxon tree), with 51 shifts  
272 (22 to faster and 29 to slower optima). For C-value, there were 9 distinct optima ( $N = 184$  taxon  
273 tree), with 4 shifts to larger and 7 shifts to smaller optima. Regime shifts in both traits were  
274 coincident at only two nodes: a *PTGR* acceleration (from  $\theta = 0.147$  to  $\theta = 2.47 \log_{10} \mu\text{m h}^{-1}$ ) and  
275 genome downsizing ( $\theta = 2.71$  to  $\theta = 0.702 \log_{10} \text{pg}$ ) in the CA of extant angiosperms; and a

276 *PTGR* slowdown ( $\theta = 2.78$  to  $\theta = 2.47 \log_{10} \mu\text{m h}^{-1}$ ) and genome size decrease ( $\theta = 0.209$  to  $\theta =$   
277  $-0.386 \log_{10} \text{pg}$ ) in the CA of rosids and Saxifragales (i.e. superrosids; Fig. 4). When the search  
278 was relaxed to include adjacent nodes, an additional coincidence occurred, with shift to higher  
279 *PTGR* followed by a shift to higher C-value near the base of monocots. Ancient WGDs  
280 coincided with the shifts in *PTGR* and C-value at the CA of angiosperms (above) and with a  
281 decrease in C-value in the CA of eudicots.

282

283

## DISCUSSION

284 The impact of genome size on *PTGR* is determined by the magnitudes of conflicting nucleotypic  
285 and genotypic effects. Such effects depend on the mechanism of genome size change.

286 Nucleotypic effects decelerate *PTGR* and are always present irrespective of mode of genome size  
287 change, whereas large-scale genetic effects are only possible after WGD. We predicted that  
288 angiosperms and gymnosperms should have different patterns of *PTGR* evolution based on their  
289 contrasting patterns of genome size change. Gymnosperm *PTGRs* should be most susceptible to  
290 nucleotypic effects because they have evolved large genomes sizes and WGDs have been rare. In  
291 contrast, angiosperms have evolved smaller genome sizes despite recurrent WGDs and  
292 widespread present-day polyploidy. Thus, gene duplication and sorting have played a much  
293 greater role in the evolution of angiosperm *PTGRs*, allowing genotypic effects to counterbalance  
294 or overwhelm nucleotypic effects. Below we discuss our findings in light of these expected  
295 patterns.

296

297 ***The evolution of PTGR in angiosperms versus gymnosperms*** - We found that seed plant  
298 *PTGRs* best fit an OU model, indicating less *PTGR* variation among lineages than expected

299 under a Brownian motion evolutionary model, with a faster optimum for angiosperms than for  
300 gymnosperms. Phylogenetic half-lives were similar (5.6 and 5.7 MY, respectively) and very  
301 short (only 3.9% and 2.3 % of their respective crown ages), indicating a strong attraction to their  
302 optimum values. Such a pattern is consistent with stabilizing selection on *PTGR* imposed by  
303 slower evolution of linked sporophytic traits, such as the timing of stigma receptivity relative to  
304 egg receptivity, pollen tube pathway length, or maternal provisioning. Gymnosperm *PTGRs* may  
305 have been constrained by a hard boundary such as by biophysical or physiological limitations, or  
306 a soft boundary, such as by lack of selection for fast rates. Angiosperms have clearly not been  
307 bound by those same limitations, given their much higher *PTGR* optimum, the convergent  
308 evolution of extremely fast *PTGRs* in many unrelated derived lineages of monocots and eudicots,  
309 and occasionally large within-genus differences in *PTGR*.

310 Our results suggest that most of the accelerations of angiosperm *PTGR*, and their higher  
311 *PTGR* variance relative to gymnosperms, have largely evolved *after* the origin of angiosperms  
312 and their novel pollen tube cell biology. First, estimates of angiosperm ancestral *PTGR* and  
313 ancestral optimum under OU (275 and 295  $\mu\text{m h}^{-1}$ , respectively) are slower than the angiosperm-  
314 wide OU optimum of 490  $\mu\text{m h}^{-1}$  and the angiosperm median of 587  $\mu\text{m h}^{-1}$ . Secondly, the higher  
315 among-lineage variance is due to many transitions to both faster and slower *PTGR* optima within  
316 extant angiosperms. Transitions to slower rates within angiosperms are concentrated on lineages  
317 that have evolved delayed fertilization, such Fagales, orchids and others, or high selfing rates,  
318 which suggests relaxation of directional selection on *PTGR* (Williams and Reese, 2019). In  
319 contrast, gymnosperm *PTGRs* were likely ancestrally slow (Figure 4).

320 There are several non-mutually exclusive hypotheses for what triggered the evolution of  
321 fast *PTGRs* in angiosperms. First, Mulcahy (1979) invoked a shift to much higher intensity of

322 pollen competition in angiosperms as a driver of the origin and continued evolution of faster  
323 growth rates. Notably, no other type of tip-growing cell in land plants (whether gametophytic or  
324 sporophytic) has evolved comparably fast tip-growth rates and none of those cell types, including  
325 gymnosperm pollen tubes, experience intense competition for resources (Williams et al., 2016).  
326 Secondly, gymnosperm *PTGRs* may be slow because they lack novel biophysical or  
327 physiological attributes of pollen tubes and/or those attributes enabled faster *PTGRs* to evolve in  
328 angiosperms (Hoekstra, 1983; Derksen et al., 1999; Fernando et al., 2005; Williams, 2008,  
329 2009). Thirdly, with or without pollen competition, rapid *PTGRs* may have been necessary as  
330 angiosperm sporophytes transitioned to a much faster reproductive cycle (Stebbins, 1974;  
331 Williams, 2012; Williams and Reese, 2019). Finally, our results suggest a new possibility, that  
332 strong differences in genome-level processes have impacted the evolution of angiosperm *PTGRs*  
333 relative to their living and extinct seed plant relatives.

334

335 ***Mechanisms of genome size change and PTGR evolution within seed plants*** – A major finding  
336 of this study is that angiosperm neo-polyploids evolved around a much faster *PTGR* optimum  
337 ( $1648 \mu\text{m h}^{-1}$ ) than diploids ( $595 \mu\text{m h}^{-1}$ ), despite several sources of variation in the data. First,  
338 neo-polyploids were by definition derived within genera, and their smaller sample size and  
339 shorter branch lengths reduced the power to estimate parameters relative to diploids, as reflected  
340 by the larger standard error around the neo-polyploid optimum. Nevertheless, the proportion of  
341 neo-polyploids in our data set (33% of angiosperms) is almost exactly that found in the full  
342 Wood et al. (2009) data set and similar to that in other studies (Mayrose et al., 2011; Barker et  
343 al., 2016; Landis et al., 2018).



344           There was also biological variability in our dataset. In our taxon sampling, we were  
345 agnostic to variation in mating systems and modes of polyploid origins, since our interest was in  
346 how *PTGR* has evolved in natural stabilized polyploids. In retrospect, our sample does seem  
347 representative. Of 14 angiosperm polyploids whose mode of origin has been studied, seven were  
348 autopolyploid and seven allopolyploid, similar to the nearly-equal proportions found by Barker  
349 et al. (2016). Furthermore, among 16 polyploids for which mating system has been studied, eight  
350 were fully outcrossing, seven were self-compatible (two autogamous, two mixed mating, and  
351 three unknown), and one was apomictic – a not unusual distribution (Goodwillie et al., 2005;  
352 Gibbs, 2014; Ashman et al., 2014). Thus, our taxon sampling seems not to have been greatly  
353 biased. Even with such information, predicting the magnitude of genetic variation in polyploids  
354 is not so simple. For example, autotetraploids originate with a subset of the genetic variation in  
355 the diploid progenitor population but they often outcross and hybridize, whereas allopolyploids  
356 can be highly heterozygous when they originate, but often are highly selfing (Stebbins, 1974;  
357 Soltis and Soltis, 1999; Barringer 2007; Whitney et al., 2010). Hence, despite several sources of  
358 heterogeneity, the faster *PTGR* optimum of neo-polyploids indicates that *PTGR* acceleration  
359 evolves either at the time of WGDs or during the time period in which the descendant species  
360 retain a polyploid chromosome number.

361           The closest approximation of the initial effect of polyploidy on *PTGR* is the comparison  
362 of diploids with their intraspecific, autopolyploid cytotypes. In all 11 pairs, *PTGR*s of  
363 autopolyploid cytotypes were slower than or equal to those of their intraspecific diploid  
364 progenitors. We should re-emphasize that all studies involved in vivo crosses among diploid  
365 sporophytes (1x pollen on 2x pistils) compared to crosses among tetraploid sporophytes (2x  
366 pollen on 4x pistils), in keeping with our goal of generalizing effects on *PTGR* in stabilized

367 polyploids. Nucleotypic effects acting to slow *PTGR* should be most apparent in autopolyploids  
368 at inception, because there is lower potential for heterosis. Thus, the lack of any examples of  
369 faster *PTGR* in neo-autotetraploid cytotypes than in their diploid progenitors suggests that  
370 increased gene dosage by itself generally does not initially fully offset nucleotypic effects.

371 Nucleotypic effects on *PTGR* could be substantial. Tube size affects *PTGR* in a linear  
372 fashion, because larger tubes must make more tube wall per unit time, and since tube diameter is  
373 constant during growth, the rate of wall production is directly proportional to tip extension rate  
374 (Williams et al., 2016). Kostoff & Prokofieva (1935) reported in vivo pollen tubes to be 39%  
375 larger in diameter in an allotetraploid *Nicotiana* relative to the mean of its presumed diploid  
376 progenitors, and Iyengar (1938) found 8-53% larger tube diameters in tetraploid versus diploid  
377 species of *Gossypium*.

378 Taken together our results suggest that nucleotypic effects are strong and act as a brake  
379 on *PTGR* at inception (intraspecific polyploid analysis), but as neo-polyploids become stabilized  
380 and persist over time, nucleotypic effects are more than offset by genotypic effects (within-genus  
381 pairs and model-based analyses) which often produce faster *PTGRs* in angiosperms.

382 We found that DNA content has evolved around a significantly lower optimum in  
383 angiosperms than in gymnosperms, even though angiosperms have a broad range of DNA C-  
384 values that encompass the entire range of seed plant genome sizes (Fig. 3; see Leitch and Leitch,  
385 2013 for a larger survey). Angiosperms also have great variation in ploidy level, a history of  
386 speciation by polyploidy, and much evidence of past genome duplication (Ahuja, 2005; Wood et  
387 al., 2009; Husband et al., 2013; Van de Peer et al., 2017; Landis et al., 2018). There were at least  
388 1-7 WGDs in the lineages leading from the seed plant root to each of the tips in our *PTGR* tree,  
389 and 33% of taxa (68/206 angiosperms versus 2/23 gymnosperms) were identified as neo-

390 polyploids. The often low DNA content and high ploidy levels of angiosperms are not surprising  
391 given that genome duplication is commonly followed by rapid loss of DNA sequences, gene  
392 fractionation by large-scale deletions, biased retention of genes with beneficial dosage effects,  
393 and ultimately a return to an apparent diploid state in sporophytes (Conant and Wolfe, 2008;  
394 Conant et al., 2014; Freeling et al., 2015; Dodsworth et al., 2016; Wendel et al., 2018). Thus, one  
395 explanation for the much faster *PTGRs* of angiosperms relative to gymnosperms is that  
396 widespread gene duplication by WGDs have often enabled transgressive evolution of faster  
397 *PTGRs* leading to the observed pattern of convergent evolution of extremely fast *PTGRs* in many  
398 unrelated lineages of monocots and eudicots.

399 WGDs have been rare in gymnosperms (Ahuja, 2005; Leitch et al., 2005; Wood et al.,  
400 2009; Soltis et al., 2009; Husband et al., 2013; Leitch and Leitch, 2013; Lee and Kim, 2014) and  
401 their high DNA contents are thought to be due mainly to high transposon activity without  
402 repeated rounds of genome duplication (Leitch & Leitch, 2013; Lee and Kim, 2014). Hence,  
403 gymnosperms may have experienced the nucleotypic effects of higher DNA content on pollen  
404 tube dimensions, which is predicted to reduce *PTGR*, without the potential for counter-balancing  
405 effects, such as initially higher gene dosage and heterozygosity followed by gene sorting during  
406 the diploidization process. Our finding of a negative correlation between *PTGR* and DNA  
407 content in gymnosperms, but not in angiosperms supports that hypothesis.

408 Though gymnosperm *PTGRs* are likely affected by tube sizes, nucleotypic effects do not  
409 account for the magnitude of the difference in their slow *PTGRs* relative to those of angiosperms.  
410 Gymnosperm pollen tubes can range up to 300  $\mu\text{m}$  in diameter (Coulter and Chamberlain, 1928;  
411 Gifford and Foster, 1989), but many species of siphonogamous conifers and Gnetales have  
412 angiosperm-like pollen tube diameters in the 10 to 20  $\mu\text{m}$  range. Yet no gymnosperm has

413 evolved a *PTGR* faster than  $20 \mu\text{m h}^{-1}$ . It has been argued that their pecto-cellulosic wall  
414 structure is a limitation relative to angiosperm pollen tube walls, which use the plasma  
415 membrane-bound enzymes callose synthase and pectin-methylesterase in a novel way to more  
416 rapidly synthesize a strong and durable tube cell wall and callose plugs (Derksen, 1999,  
417 Abercrombie et al., 2012; Wallace and Williams, 2017). However, other types of pecto-cellosic  
418 tip-growing cells, such as root hairs, grow faster than gymnosperm pollen tubes (Williams et al.,  
419 2016). Thus, it seems likely that the extremely slow growth rates of gymnosperm pollen tubes  
420 reflect an ancestrally antagonistic relationship between maternal tissues and pollen tubes that  
421 functioned as invasively growing rhizoids, coupled with a lack of selection for faster growth rate  
422 due to the absence of pollen competition and a long period between pollination and fertilization.  
423 Our results also suggest a lack of opportunity for genotypic effects to evolve due to the rarity of  
424 WGDs.

425

426 **Conclusions** - Studies across the tree of life have consistently shown that ploidy level and DNA  
427 content are correlated with cell size and metabolic rate (Cavalier-Smith, 1978; Gregory, 2001;  
428 Cavalier-Smith, 2005). Pollen tube dimensions and energetics affect the amount of cell wall  
429 material produced per unit of growth and the rate at which cell wall is produced, which together  
430 determine *PTGR*. In gymnosperms, *PTGR* was negatively correlated with genome size, but in  
431 angiosperms, where the effects of WGDs are much more prevalent, there was no such  
432 correlation, and neo-polyploids evolved around a higher *PTGR* optimum than diploids. These  
433 results support the expectation that genome size increases incur nucleotypic effects that act as a  
434 brake on growth rate. The degree to which genotypic effects counterbalance nucleotypic effects  
435 depends on the historical nature and time since genome size increase in any particular lineage.

436 Understanding causal relationships between genome size, ploidy and *PTGR* will involve  
437 mechanistic studies of tube cell dimensions and wall synthesis rates in haploid and polyploid  
438 gametophytes. On the other hand, there appears to be great variation in the tug of war between  
439 genotypic and nucleotypic effects, and there are likely to be deeper evolutionary patterns  
440 underlying that variation.

441

442

443

444

#### ACKNOWLEDGEMENTS

445 We thank B. O'Meara and J. Beaulieu for advice on phylogenetic analyses, I. Leitch for data on  
446 DNA content, and J. Edwards and M. Rankin for assistance in the lab. We are tremendously  
447 grateful to several anonymous reviewers for their perceptive and useful comments. Partial  
448 support to J.B.R. was provided by National Science Foundation award IOS 1052291 to J.H.W.

449

450

451 **Authors Contributions:** J.B.R. and J.H.W. jointly conceived of the study and wrote the paper;  
452 J.B.R. collected data on genome sizes and ploidy levels, constructed the phylogenetic tree and  
453 performed all comparative analyses; J.H.W. collected data on *PTGRs* and diploid-autopolyploid  
454 *PTGRs*.

455

456 **Data Accessibility Statement:** Scripts written during the creation of this manuscript are  
457 available on GitHub: <https://github.com/jbr1848/PTGR.genome.evolution>. The phylogenetic tree  
458 created during this study can be found on TreeBase:  
459 <http://purl.org/phylo/treebase/phylovs/study/TB2:S24291>.

460

461

462

463  
464  
465  
466  
  
467  
468  
469  
470  
471  
472  
  
473  
474  
475  
  
476  
477  
478  
479  
480  
  
481  
482  
  
483  
484  
  
485  
  
486  
487  
488

## LITERATURE CITED

- Abercrombie, J. M., B. C. O’Meara, A. R. Moffatt, and J. H. Williams. 2011. Developmental evolution of flowering plant pollen tube cell walls: callose synthase (CalS) gene expression patterns. *EvoDevo* 2: 14.
- Ahuja, M. R. 2005. Polyploidy in gymnosperms: revisited. *Silvae Genetica* 54:2:59-69.
- Arunkumar, R., E. B. Josephs, R. J. Williamson, and S. I. Wright. 2013. Pollen-specific, but not sperm-specific, genes show stronger purifying selection and higher rates of positive selection than sporophytic genes in *Capsella grandiflora*. *Molecular Biology and Evolution* 30: 2475–2486.
- Ashman, T-L., D. Bachtrog, H. Blackmon, E. E. Goldberg, M. W. Hahn, M. Kirkpatrick, J. Kitano, J. E. Mank, et al. 2014. Tree of Sex: A database of sexual systems. *Scientific Data* 1: 140015.
- Barker, M. S., N. Arrigo, A. E. Baniaga, Z. Li, & D. A. Levin. (2016). On the relative abundance of autopolyploids and allopolyploids. *New Phytologist*, 210(2), 391-398.
- Beaulieu, J. M., and B. O’Meara. 2014. *OUwie*: analysis of evolutionary rates in an OU framework. *R package version 1*.
- Bennett, M. D. 1971. The duration of meiosis. *Proceedings of the Royal Society of London B: Biological Sciences* 178: 277–299.
- Bennett, M. D. 1972. Nuclear DNA content and minimum generation time in herbaceous plants. *Proceedings of the Royal Society of London B: Biological Sciences* 181: 109–135.
- Bennett, M. D., and I. J. Leitch. 2012. Plant DNA C-values Database (Release 6.0).
- Birchler, J. A., H. Yao, S. Chudalayandi, D. Vaiman, and R. A. Veitia. 2010. Heterosis. *Plant Cell*: 110.076133.

- 489 Blomberg, S. P., T. Garland Jr., and A. R. Ives. 2003. Testing for phylogenetic signal in  
490 comparative data: behavioral traits are more labile. *Evolution* 57: 717–745.
- 491 Burnham, K. P., and D. R. Anderson. 2002. Model selection and multimodel inference: a  
492 practical information-theoretic approach. *New York. Springer-Verlag.*
- 493
- 494 Cavalier-Smith, T. 1978. Nuclear volume control by nucleoskeletal DNA, selection for cell  
495 volume and cell growth rate, and the solution of the DNA C-value paradox. *Journal of Cell*  
496 *Science* 34: 247–278.
- 497 Cavalier-Smith, T. 2005. Economy, speed and size matter: evolutionary forces driving nuclear  
498 genome miniaturization and expansion. *Annals of Botany* 95: 147–175.
- 499 Christenhusz, M. J., J. L. Reveal, A. Farjon, M. F. Gardner, R. R. Mill, and M. W. Chase. 2011.  
500 A new classification and linear sequence of extant gymnosperms. *Phytotaxa* 19: 55–70.
- 501
- 502 Comai, L. 2005. The advantages and disadvantages of being polyploid. *Nature Reviews Genetics*  
503 6: 836.
- 504 Conant, G. C., J. A. Birchler, and J. C. Pires. 2014. Dosage, duplication, and diploidization:  
505 clarifying the interplay of multiple models for duplicate gene evolution over time. *Current*  
506 *Opinion in Plant Biology* 19: 91–98.
- 507 Conant, G. C., and K. H. Wolfe. 2008. Turning a hobby into a job: how duplicated genes find  
508 new functions. *Nature Reviews Genetics* 9: 938.
- 509 Coulter, J. M., and C. J. Chamberlain. 1928. *Morphology of Gymnosperms* (4th ed.). University  
510 of Chicago Press, Chicago.
- 511
- 512 Cosgrove, D. J. 2005. Growth of the plant cell wall. *Nature Reviews Molecular Cell Biology* 6:  
513 850.



- 514 De Smet, R., K. L. Adams, K. Vandepoele, M. C. Van Montagu, S. Maere, and Y. Van de Peer.  
515 2013. Convergent gene loss following gene and genome duplications creates single-copy  
516 families in flowering plants. *Proceedings of the National Academy of Sciences* 110: 2898–2903.  
517
- 518 Derksen, J., Y. Li, B. Knuiman, and H. Geurts. 1999. The wall of *Pinus sylvestris* L. pollen  
519 tubes. *Protoplasma* 208: 26–36.
- 520 Dodsworth, S., M. W. Chase, and A. R. Leitch. 2016. Is post-polyploidization diploidization the  
521 key to the evolutionary success of angiosperms? *Botanical Journal of the Linnean Society* 180:  
522 1–5.
- 523 Doyle, J. J., and J. E. Coate. 2019. Polyploidy, the Nucleotype, and Novelty: The Impact of  
524 Genome Doubling on the Biology of the Cell. *International Journal of Plant Sciences* 180: 1–52.  
525
- 526 Eastman, J. M., L. J. Harmon, and D. C. Tank. 2013. Congruification: support for time scaling  
527 large phylogenetic trees. *Methods in Ecology and Evolution* 4: 688–691.
- 528 Felsenstein, J. 1985. Phylogenies and the comparative method. *American Naturalist* 125: 1–15.
- 529 Fernando, D. D., M. D. Lazzaro, and J. N. Owens. 2005. Growth and development of conifer  
530 pollen tubes. *Sexual Plant Reproduction* 18: 149–162.
- 531 Freeling, M., M. J. Scanlon, and J. E. Fowler. 2015. Fractionation and subfunctionalization  
532 following genome duplications: mechanisms that drive gene content and their consequences.  
533 *Current Opinion in Genetics & Development* 35: 110–118.
- 534 Friedman, W. E. 1993. The evolutionary history of the seed plant male gametophyte. *Trends in*  
535 *Ecology & Evolution* 8: 15–21.
- 536 Gibbs, P. E. 2014. Late-acting self-incompatibility—the pariah breeding system in flowering  
537 plants. *New Phytologist* 203: 717–734.
- 538 Gifford, E. M., and A. S. Foster. 1989. Morphology and Evolution of Vascular Plants. W. H.  
539 Freeman, New York.
- 540

- 541 Goodwillie, C., S. Kalisz, and C. G. Eckert. 2005. The evolutionary enigma of mixed mating  
542 systems in plants: occurrence, theoretical explanations, and empirical evidence. *Annual Review*  
543 *of Ecology Evolution and Systematics*. 36: 47–79.
- 544 Grafen, A. 1989. The phylogenetic regression. *Philosophical Transactions of the Royal Society*  
545 *of London. Series B, Biological Sciences* 326: 119–157.
- 546 Gregory, T. R. 2001. The bigger the C-value, the larger the cell: genome size and red blood cell  
547 size in vertebrates. *Blood Cells, Molecules, and Diseases* 27: 830–843.
- 548 Hafidh, S., J. Fila, and D. Honys. 2016. Male gametophyte development and function in  
549 angiosperms: a general concept. *Plant Reproduction* 29: 31–51.
- 550 Harmon, L. J., J. T. Weir, C. D. Brock, R. E. Glor, and W. Challenger. 2008. GEIGER:  
551 investigating evolutionary radiations. *Bioinformatics* 24: 129–131.
- 552 Ho, L. S. T., and C. Anné. 2014. *Phyloilm: phylogenetic linear regression. R package version*  
553 *2.1*.
- 554 Hoekstra, F. A. 1983. Physiological evolution in angiosperm pollen: possible role of pollen  
555 vigour. In: Mulcahy DL, Ottaviano E, eds. *Pollen: Biology and Implications for Plant Breeding*,  
556 35–41. Elsevier Science, Amsterdam.
- 557
- 558 Husband, B. C. 2016. Effect of inbreeding on pollen tube growth in diploid and tetraploid  
559 *Chamerion angustifolium*: Do polyploids mask mutational load in pollen? *American Journal of*  
560 *Botany* 103: 532–540.
- 561 Husband, B. C., S. J. Baldwin, and J. Suda. 2013. The incidence of polyploidy in natural plant  
562 populations: major patterns and evolutionary processes. In J. Greilhuber, J. Doležal, and J. F.  
563 Wendel [eds.], *Plant Genome Diversity Volume 2*, 255–276. Springer.
- 564 Husband, B. C., and D. W. Schemske. 1997. The effect of inbreeding in diploid and tetraploid  
565 populations of *Epilobium angustifolium* (Onagraceae): implications for the genetic basis of  
566 inbreeding depression. *Evolution* 51: 737–746.

- 567 Ingram, T., and D. L. Mahler. 2013. SURFACE: detecting convergent evolution from  
568 comparative data by fitting Ornstein-Uhlenbeck models with stepwise Akaike Information  
569 Criterion. *Methods in Ecology and Evolution* 4: 416–425.
- 570 Iyengar N. K. 1938. Pollen-tube studies in *Gossypium*. *Journal of Genetics* 37: 69–106.
- 571 Jörgensen A, and C. Rydin. 2015. Reproductive morphology in the *Gnetum cuspidatum* group  
572 (Gnetales) and its implications for pollination biology in the Gnetales. *Plant Ecology and*  
573 *Evolution* 148: 387–396.
- 574 Kostoff, D., and A. Prokofieva. 1935. Studies on the pollen-tubes. I. The growth potency of the  
575 pollen-tubes in *Nicotiana* in connection with the length of the styles and some other factors. *Bul.*  
576 *Inst. Genetics, Acad. Sci. Leningrad* 10: 65–82.
- 577 Lande, R., and D. W. Schemske. 1985. The evolution of self-fertilization and inbreeding  
578 depression in plants. I. Genetic models. *Evolution* 39: 24–40.
- 579 Landis, J. B., D. E. Soltis, Z. Li, H. E. Marx, M. S. Barker, D. C. Tank, and P. S. Soltis. 2018.  
580 Impact of whole-genome duplication events on diversification rates in angiosperms. *American*  
581 *Journal of Botany*.
- 582 Lee, S-I., and N-S. Kim. 2014. Transposable elements and genome size variations in plants.  
583 *Genomics & Informatics* 12: 87–97.
- 584 Leitch, I. J., M. W. Chase, and M. D. Bennett. 1998. Phylogenetic analysis of DNA C-values  
585 provides evidence for a small ancestral genome size in flowering plants. *Annals of Botany* 82:  
586 85–94.
- 587 Leitch, A. R., and I. J. Leitch. 2012. Ecological and genetic factors linked to contrasting genome  
588 dynamics in seed plants. *New Phytologist* 194: 629–646.
- 589 Leitch, I. J., and A. R. Leitch. 2013. Genome size diversity and evolution in land plants. *In* J.  
590 Greilhuber, J. Doležal, and J. F. Wendel [eds.], *Plant Genome Diversity Volume 2*, 307–322.  
591 Springer.

- 592 Leitch, I. J., D. E. Soltis, P. S. Soltis, and M. D. Bennett. 2005. Evolution of DNA amounts  
593 across land plants (Embryophyta). *Annals of Botany* 95: 207–217.
- 594 Li, Z., A. E. Baniaga, E. B. Sessa, M. Scascitelli, S. W. Graham, L. H. Rieseberg, and M. S.  
595 Barker 2015. Early genome duplications in conifers and other seed plants. *Science Advances* 1:  
596 e1501084.
- 597
- 598 Magallón, S., S. Gómez-Acevedo, L. L. Sánchez-Reyes, and T. Hernández-Hernández. 2015. A  
599 metacalibrated time-tree documents the early rise of flowering plant phylogenetic diversity. *New*  
600 *Phytologist* 207: 437–453.
- 601 Martins, E. P., T. F. Hansen. 1997. Phylogenies and the comparative method: a general approach  
602 to incorporating phylogenetic information into the analysis of interspecific data. *The American*  
603 *Naturalist* 149: 646–667.
- 604 Mayrose, I., Zhan, S. H., Rothfels, C. J., Magnuson-Ford, K., Barker, M. S., Rieseberg, L. H.,  
605 and S. P. Otto. 2011. Recently formed polyploid plants diversify at lower rates. *Science* 333:  
606 1257-1257.
- 607 Mulcahy, D.L. 1979. The rise of the angiosperms: a genealogical factor. *Science* 206: 20–23.
- 608 Ohri, D., and T. N. Khoshoo. 1986. Genome size in gymnosperms. *Plant Systematics and*  
609 *Evolution* 153: 119–132.
- 610 Otto, S. P., M. F. Scott, and S. Immler. 2015. Evolution of haploid selection in predominantly  
611 diploid organisms. *Proceedings of the National Academy of Sciences* 112: 15952–15957.
- 612 Owens, J. N., T. Takaso, and C. J. Runions. 1998. Pollination in conifers. *Trends in Plant*  
613 *Science* 3: 479–485.
- 614 Pagel, M. 1997. Inferring evolutionary processes from phylogenies. *Zoologica Scripta* 26: 331–  
615 348.
- 616 Pagel, M. 1999. Inferring the historical patterns of biological evolution. *Nature* 401: 877.

- 617 Panchy, N., M. Lehti-Shiu, and S-H. Shiu. 2016. Evolution of gene duplication in plants. *Plant*  
618 *Physiology* 171: 2294–2316.
- 619 Paradis, E., J. Claude, and K. Strimmer. 2004. APE: analyses of phylogenetics and evolution in  
620 R language. *Bioinformatics* 20: 289–290.
- 621 Price, H. 1988. DNA Content Variation Among Higher-Plants. *Annals of the Missouri Botanical*  
622 *Garden* 75: 1248–1257.
- 623 Revell, L. J. 2012. Phytools: an R package for phylogenetic comparative biology (and other  
624 things). *Methods in Ecology and Evolution* 3: 217–223.
- 625 Rutley, N., and D. Twell. 2015. A decade of pollen transcriptomics. *Plant Reproduction* 28: 73-  
626 89.
- 627
- 628 Smith, S. A., and M. J. Donoghue. 2008. Rates of molecular evolution are linked to life history  
629 in flowering plants. *Science* 322: 86–89.
- 630 Smith, S. A., and C. W. Dunn. 2008. Phyutility: a phyloinformatics tool for trees, alignments and  
631 molecular data. *Bioinformatics* 24: 715–716.
- 632 Snodgrass, S. J., J. Jaraczek and J. F. Wendel. 2016. An examination of nucleotypic effects in  
633 diploid and polyploid cotton. *AoB PLANTS*. 8: plw082.
- 634
- 635 Soltis, D. E., V. A. Albert, J. Leebens-Mack, C. D. Bell, A. H. Paterson, C. Zheng, D. Sankoff et  
636 al. 2009. Polyploidy and angiosperm diversification. *American Journal of Botany* 96: 336–348.
- 637 Soltis, D. E., and P. S. Soltis. 1999. Polyploidy: recurrent formation and genome evolution.  
638 *Trends in Ecology & Evolution* 14: 348–352.
- 639 Soltis, P. S., & Soltis, D. E. 2000. The role of genetic and genomic attributes in the success of  
640 polyploids. *Proceedings of the National Academy of Sciences* 97: 7051-7057.
- 641 Stamatakis, A. 2014. RAxML version 8: a tool for phylogenetic analysis and post-analysis of  
642 large phylogenies. *Bioinformatics* 30: 1312–1313.

- 643 Stebbins, G. L. 1974. Flowering plants: evolution above the species level. *London: Arnold xviii,*  
644 *399p. Illustrations. General (KR, 197500089).*
- 645 Swift, H. 1950. The constancy of desoxyribose nucleic acid in plant nuclei. *Proceedings of the*  
646 *National Academy of Sciences* 36: 643–654.
- 647 Tanksley, S. D., D. Zamir, and C. M. Rick. 1981. Evidence for extensive overlap of sporophytic  
648 and gametophytic gene expression in *Lycopersicon esculentum*. *Science* 213: 453–455.
- 649 Van de Peer, Y., E. Mizrachi, and K. Marchal. 2017. The evolutionary significance of  
650 polyploidy. *Nature Reviews Genetics* 18: 411.
- 651 Wallace, S., and J. H. Williams. 2017. Evolutionary origins of pectin methylesterase genes  
652 associated with novel aspects of angiosperm pollen tube walls. *Biochemical and biophysical*  
653 *research communications* 487: 509–516.
- 654 Wendel, J. F., D. Lisch, G. Hu, and A. S. Mason. 2018. The long and short of doubling down:  
655 polyploidy, epigenetics, and the temporal dynamics of genome fractionation. *Current Opinion in*  
656 *Genetics & Development* 49: 1–7.
- 657 Whitney, K. D., E. J. Baack, J. L. Hamrick, M. J. W. Godt, B. C. Barringer, M. D. Bennett, C. G.  
658 Eckert et al. 2010. A role for nonadaptive processes in plant genome size evolution? *Evolution:*  
659 64: 2097–2109.
- 660 Williams, J. H. 2008. Novelities of the flowering plant pollen tube underlie diversification of a  
661 key life history stage. *Proceedings of the National Academy of Sciences* 105: 11259–11263.
- 662 Williams, J. H. 2009. *Amborella trichopoda* (Amborellaceae) and the evolutionary  
663 developmental origins of the angiosperm progamic phase. *American Journal of Botany* 96: 144–  
664 165.
- 665 Williams, J. H. 2012. Pollen tube growth rates and the diversification of flowering plant  
666 reproductive cycles. *International Journal of Plant Sciences* 173: 649–661.

- 667 Williams, J. H., J. A. Edwards, and A. J. Ramsey. 2016. Economy, efficiency, and the evolution  
668 of pollen tube growth rates. *American Journal of Botany* 103: 471–483.
- 669 Williams, J. H., and J. B. Reese. 2019. Evolution of development of pollen performance. *In* U.  
670 Grossinklaus [ed.], *Plant Development and Evolution. Current Topics in Developmental*  
671 *Biology*, Volume 131. Chapter 12. 299-336. Elsevier.
- 672 Williams, J. H., M. L. Taylor, and B. C. O’Meara. 2014. Repeated evolution of tricellular (and  
673 bicellular) pollen. *American Journal of Botany* 101: 559–571.
- 674 Wood, T. E., N. Takebayashi, M. S. Barker, I. Mayrose, P. B. Greenspoon, and L. H. Rieseberg.  
675 2009. The frequency of polyploid speciation in vascular plants. *Proceedings of the National*  
676 *Academy of Sciences* 106: 13875–13879.

677 **Table 1:** Phylogenetic generalized least squares regression of  $\log_{10} PTGR$  as a function of  $\log_{10}$   
 678 C-value. Only models contributing more than 1% of total weight are included. *P* values are for  
 679 the slope of the regression. Gymnosperm averaged model:  $\text{Log}_{10} PTGR = 1.46 (\pm 0.62) - 1.09 (\pm$   
 680  $0.49) * (\log_{10} \text{C-value})$ .

681  
 682

| Seed plants ( <i>N</i> = 183) |        |          | Angiosperms ( <i>N</i> = 161) |        |          | Gymnosperms ( <i>N</i> = 23) |        |          |
|-------------------------------|--------|----------|-------------------------------|--------|----------|------------------------------|--------|----------|
| Model                         | Weight | <i>P</i> | Model                         | Weight | <i>P</i> | Model                        | Weight | <i>P</i> |
| kappa                         | 0.999  | 0.463    | kappa                         | 0.975  | 0.284    | OU                           | 0.265  | 0.020    |
|                               |        |          | lambda                        | 0.024  | 0.221    | delta                        | 0.257  | 0.006    |
|                               |        |          |                               |        |          | kappa                        | 0.193  | 0.445    |
|                               |        |          |                               |        |          | BM                           | 0.121  | 0.001    |
|                               |        |          |                               |        |          | lambda                       | 0.119  | 0.327    |
|                               |        |          |                               |        |          | EB                           | 0.044  | 0.001    |

683  
 684  
 685  
 686  
 687  
 688



689 **Table 2: Parameter estimates for angiosperm *PTGR* analyses under different evolutionary**  
 690 **models.** Note that OU1 is a single optimum model, and the rest specify separate “diploid”  
 691 (paleo-polyploid) and neo-polyploid optima. BM1 and BMS models contributed <1% model  
 692 weight and were excluded.

693

694

| <b>Model</b>          | <b><math>\Delta AICc</math></b> | <b>Model weight</b> | <b>Diploid <math>\sigma^2</math></b> | <b>Polyploid <math>\sigma^2</math></b> | <b>Diploid <math>\alpha</math></b> | <b>Polyploid <math>\alpha</math></b> | <b>Diploid optimum</b> | <b>Polyploid optimum</b> |
|-----------------------|---------------------------------|---------------------|--------------------------------------|----------------------------------------|------------------------------------|--------------------------------------|------------------------|--------------------------|
| <b>OUMA</b>           | [332.76]                        | 0.373               | 0.099                                |                                        | 0.077                              | 0.074                                | 2.776                  | 3.285                    |
| <b>OUMV</b>           | 0.23                            | 0.333               | 0.099                                | 0.057                                  | 0.077                              |                                      | 2.768                  | 3.262                    |
| <b>OUM</b>            | 1.53                            | 0.174               | 0.090                                |                                        | 0.080                              |                                      | 2.760                  | 3.263                    |
| <b>OU1</b>            | 2.26                            | 0.120               | 0.089                                |                                        | 0.077                              |                                      | 2.812                  |                          |
| <b>AVERAGED MODEL</b> |                                 | ~1.0                | 0.096 ± 0.177                        | 0.082 ± 0.220                          | 0.078 ± 0.213                      | 0.077 ± 0.217                        | 2.775 ± 0.079          | 3.217 ± 0.231            |

695

696

697

## FIGURE LEGENDS

698 **Figure 1. Predicted initial effects of large increases in genome size on pollen tube growth**

699 **rate (*PTGR*).** The dashed line indicates an ancestral haploid (1x) *PTGR*. Upon transition to a

700 larger (> 1x) genome size, nucleotypic effects should act to decrease *PTGR* regardless of

701 mechanism of change. Genotypic effects are only present after WGD or large-scale gene

702 duplications and are predicted to increase *PTGR* via increased gene dosage and heterozygosity.

703 The magnitude of heterosis due to initial increase in heterozygosity is expected to scale with

704 genetic variation in the descendent taxon. The ancestral haploid *PTGR* can only be conserved

705 when genotypic and nucleotypic effects perfectly offset each other.

706

707 **Figure 2: Relationship between pollen tube growth rate (*PTGR*) and DNA content (1C-**

708 **value) in seed plants.** The model- averaged slope of the PGLS regression is shown for

709 gymnosperms (green points,  $N = 161$ ), whereas slopes for seed plants (all points,  $N = 183$ ) and

710 angiosperms (purple points,  $N = 23$ ) were non-significant. Optima (with standard error bars) for

711 each group (from model-based analyses in Tables S3, S4) are included for illustrative purposes.

712

713 **Figure 3: Inferred pattern of pollen tube growth rate (*PTGR*) and genome size changes in**

714 **seed plants.** Contour plot comparing *PTGR* evolution (left,  $\mu\text{m h}^{-1}$ ) and C-value evolution (right,

715 picograms) ( $N = 183$ ). Scale bar at the bottom of each phylogeny indicates 100 million years.

716 GYM = gymnosperms; ANA = Amborellales, Nymphaeales, Austrobaileyales, Chloranthales,

717 eumagnoliids; MONO = monocots.

718

719 **Figure 4: Coincident evolution of pollen tube growth rate (*PTGR*) and DNA content (C-**  
720 **value).** Paired *SURFACE* plot showing regime shifts in *PTGR* (left) versus DNA content (right)  
721 ( $N = 183$ ). Nodes which have experienced a regime shift along the stem leading to it are marked  
722 with magenta diamonds (not all *PTGR* shifts are shown, since *PTGR* tree has been pruned to  
723 match C-value tree). Branch colors: *gray* = seed plant ancestral optimum (*PTGR*  $\theta = 0.147$ ; C-  
724 value  $\theta = 2.71$ ); *green* = ancestral optimum for angiosperms (*PTGR*  $\theta = 2.47$ ; C-value  $\theta =$   
725  $0.702$ ); *red* = derived lineages following a shift to a higher optimum than previously; *blue* =  
726 derived lineages following a shift to a lower optimum than previously. Black arrows indicate  
727 instances where shifts in *PTGR* and C-value coincide. Scale bar at the bottom of each phylogeny  
728 indicates 100 million years. GYM = gymnosperms; A = Amborellales, Nymphaeales,  
729 Autrobaileyales, Chloranthales, eumagnoliids; MONO = monocots.

730

731 **Additional Supporting Information may be found online in the supporting information**  
732 **section at the end of the article:**

733

734 **Appendix S1: 119 additional *PTGR* values and references not reported in Williams 2012.**

735

736 **Appendix S2: Pollen tube growth rate (*PTGR*) evolution across Spermatophytes.**

737

738 **Appendix S3: Summary statistics for pollen tube growth rate (*PTGR*) of *Magnolia***  
739 ***grandiflora*.**

740

741 **Appendix S4: Sensitivity analysis for the magnitude of  $\log_{10}$  *PTGR* error estimates.**

742

743 **Appendix S5: *PTGR* evolution in gymnosperms vs. angiosperms.**

744

745 **Appendix S6: C-value evolution in gymnosperms vs. angiosperms.**

746

747 **Appendix S7: Closely-related taxon analyses.**

748

749 **Appendix S8: Phylogenetic ANCOVA results.**

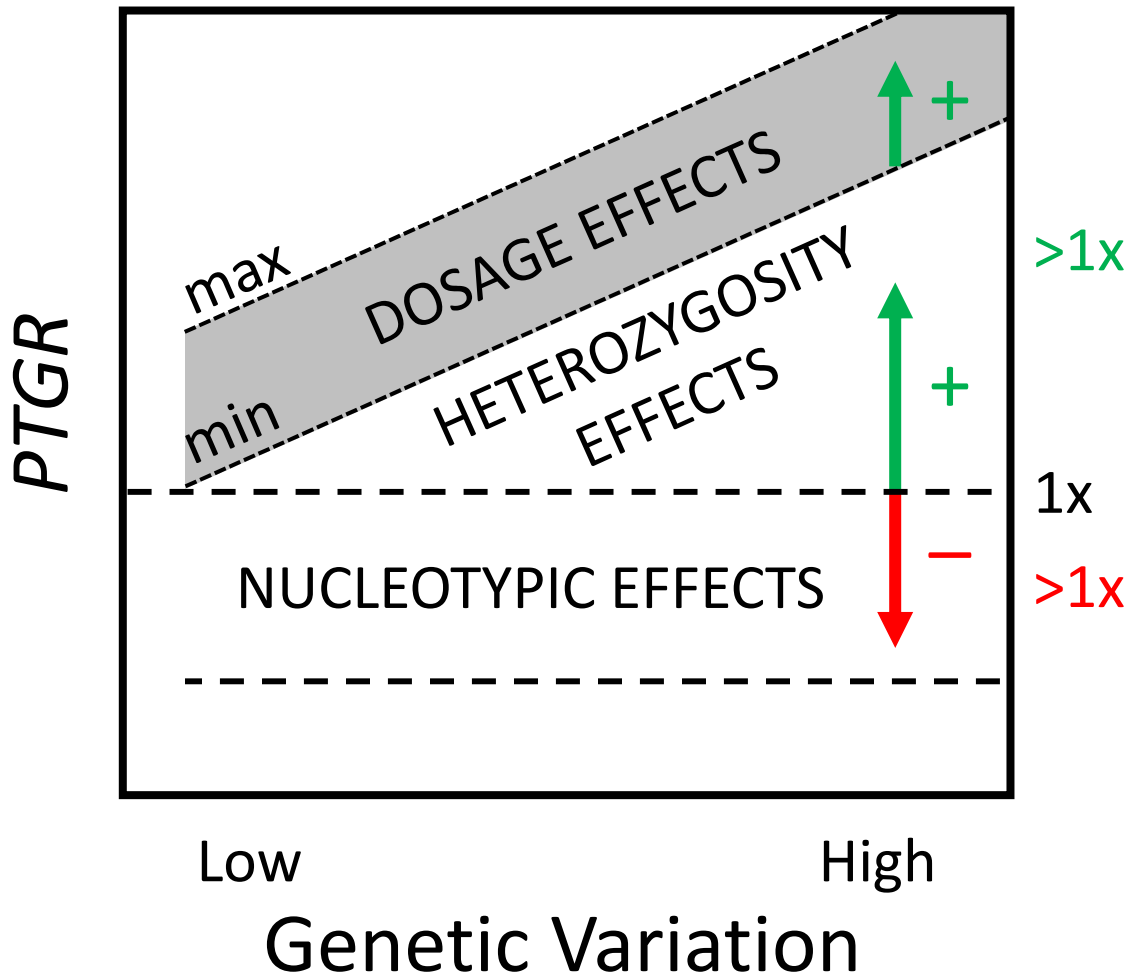

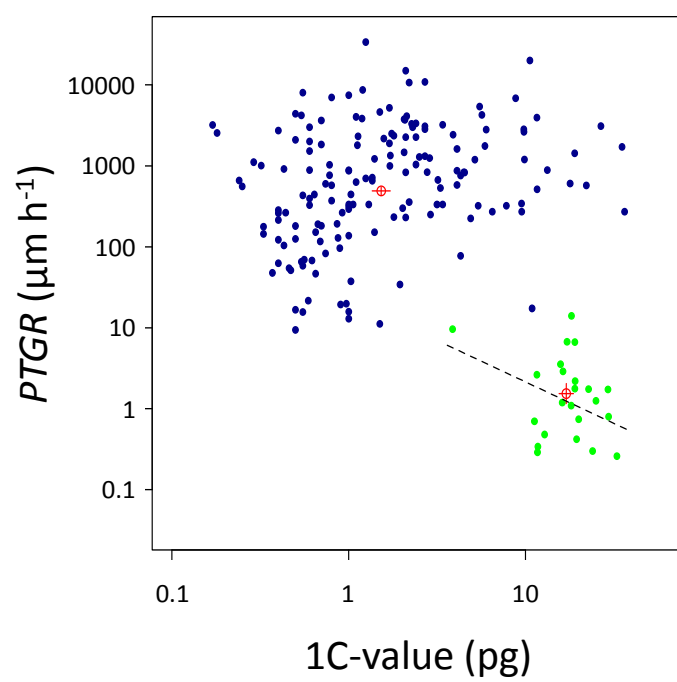

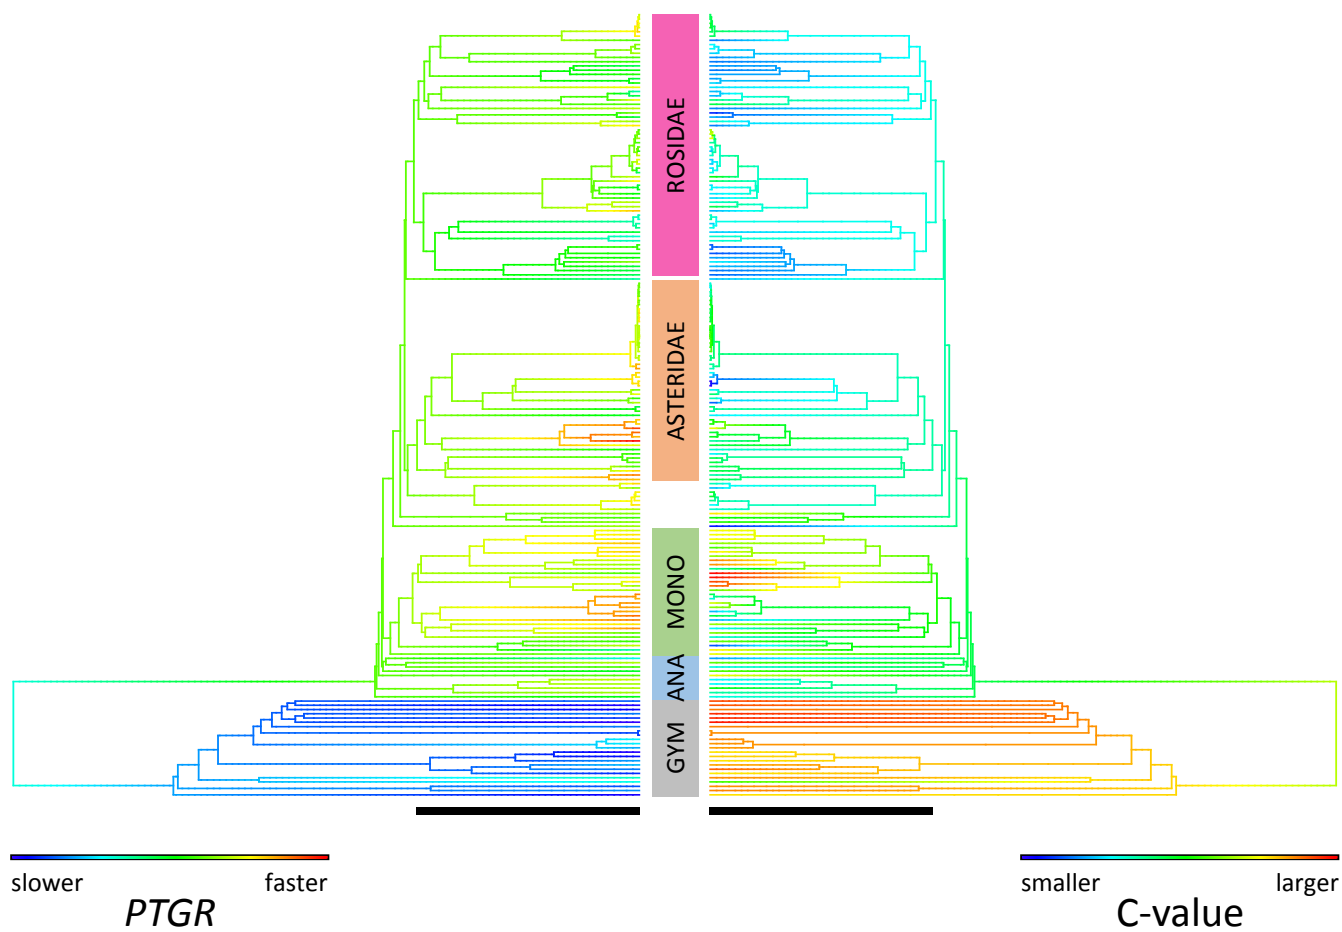

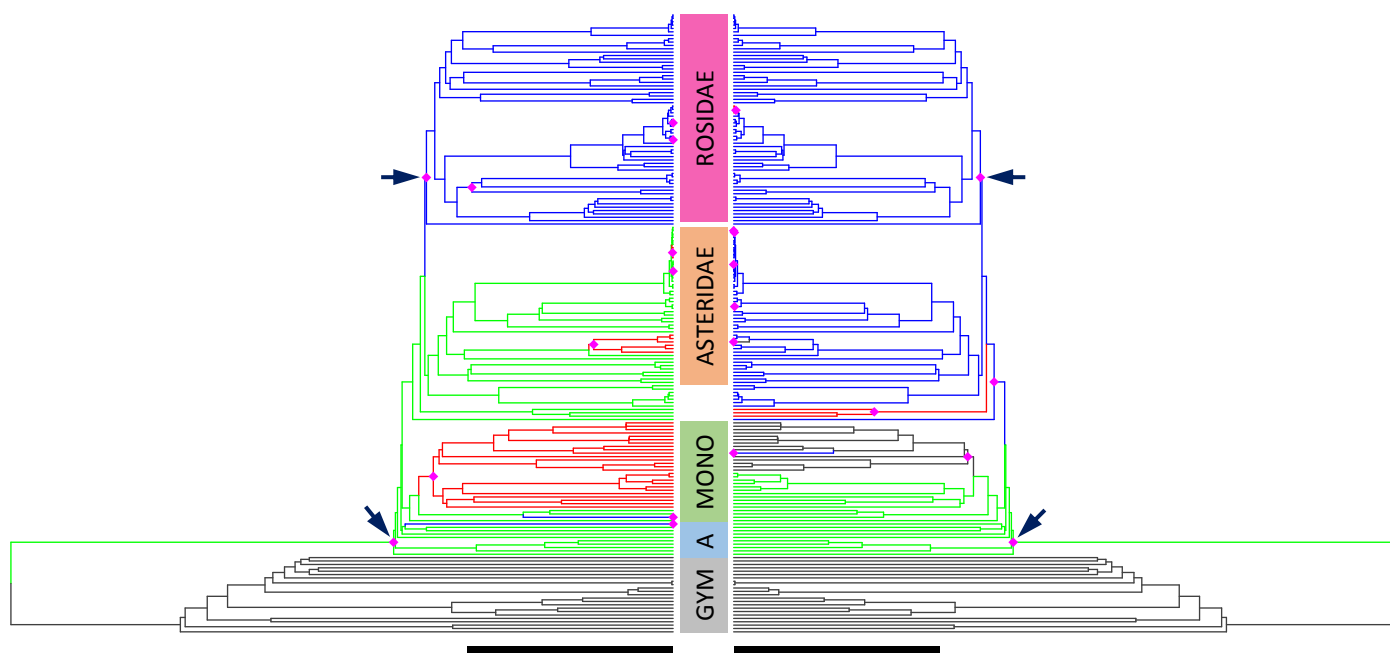



Reese and Williams 2019 – American Journal of Botany – Appendix S1

**Appendix S1:** 119 additional *PTGR* values and references not reported in Williams 2012.

| <b>Taxon</b>                    | <b><i>PTGR</i><br/>(<math>\mu\text{m h}^{-1}</math>)</b> | <b>Reference</b>                             |
|---------------------------------|----------------------------------------------------------|----------------------------------------------|
| <i>Abelmoschus esculentus</i>   | 5217                                                     | Patil et al 2013                             |
| <i>Abutilon x hybridum</i>      | 1292                                                     | Cited in Sears 1937                          |
| <i>Acacia mangium</i>           | 46.5                                                     | Ngheim et al 2013                            |
| <i>Acacia_auriculiformis</i>    | 116                                                      | Ngheim et al 2013                            |
| <i>Acer rubrum</i>              | 182                                                      | van Ryn et al 1988, Radford et al 1968       |
| <i>Aegle marmelos</i>           | 181                                                      | Bhardwaj and Tandon 2013                     |
| <i>Albuca canadensis</i>        | 1000                                                     | Johnson et al 2012                           |
| <i>Albuca setosa</i>            | 2477                                                     | Johnson et al 2012                           |
| <i>Alstroemeria aurea</i>       | 3091                                                     | Aizen and Raffaele 1998, De Jeu et al. 1996  |
| <i>Alstroemeria pelegrina</i>   | 574                                                      | De Jeu et al. 1996                           |
| <i>Anathallis</i>               | 4320                                                     | Gontijo et al 2010                           |
| <i>Antirrhinum controversum</i> | 131                                                      | Cario and Guemes 2014                        |
| <i>Antirrhinum valentinum</i>   | 160                                                      | Cario and Guemes 2014                        |
| <i>Aureolaria pedicularia</i>   | 15.2                                                     | Ramstetter and Mulcahy 1986                  |
| <i>Bertholletia excels</i>      | 800                                                      | Moritz and Ludders 1993                      |
| <i>Betula papyrifera</i>        | 11.1                                                     | Williams unpubl.                             |
| <i>Boswellia serrata</i>        | 182                                                      | Sunnichan et al 2005                         |
| <i>Brassica rapa</i>            | 371                                                      | Hiroi et al 2013                             |
| <i>Calluna vulgaris</i>         | 387                                                      | Behrend et al 2012, Mahy and Jacquemart 1999 |
| <i>Cambessedesia</i>            | 587                                                      | dos Santos et al 2012                        |
| <i>Camellia oleifera</i>        | 338                                                      | Gao et al 2015                               |
| <i>Carica papaya</i>            | 214                                                      | Traub and O'Rork 1939                        |
| <i>Ceiba pentandra</i>          | 2500                                                     | Gribel et al 1999                            |
| <i>Ceratonia siliqua</i>        | 152                                                      | Von Haselberg et al. 2004                    |
| <i>Chamaecrista fasciculata</i> | 637                                                      | Tucker 1996, Fenster and Sork 1988           |
| <i>Citrullus lanatus</i>        | 1151                                                     | Sedgley and Buttrose 1978                    |
| <i>Citrus maxima</i>            | 58.3                                                     | Distefano et al 2012                         |
| <i>Citrus medica</i>            | 122                                                      | Distefano et al 2012                         |
| <i>Citrus reticulata</i>        | 51.3                                                     | Distefano et al 2012                         |
| <i>Clarkia xantiana</i>         | 630                                                      | Hove and Mazer 2013                          |
| <i>Commiphora wrightii</i>      | 42.4                                                     | Geetha et al 2013                            |
| <i>Cornus florida</i>           | 70.8                                                     | Reed 2004                                    |
| <i>Corylus heterophylla</i>     | 62.5                                                     | Liu et al 2014                               |
| <i>Cucumis anguria</i>          | 774                                                      | Matsumoto et al. 2012                        |
| <i>Cucumis melo</i>             | 870                                                      | Matsumoto et al. 2012                        |
| <i>Cucumis metulifer</i>        | 1009                                                     | Matsumoto et al. 2012                        |
| <i>Cybistax antisiphilitica</i> | 583                                                      | Bittencourt et al 2010                       |

Reese and Williams 2019 – American Journal of Botany – Appendix S1

|                                   |      |                                             |
|-----------------------------------|------|---------------------------------------------|
| <i>Cyrtandra kauaiensis</i>       | 261  | Johnson et al 2015                          |
| <i>Cyrtandra longifolia</i>       | 221  | Johnson et al 2015                          |
| <i>Cyrtandra platyphylla</i>      | 305  | Johnson et al 2015                          |
| <i>Cytisus multiflorus</i>        | 4.48 | Valtueña et al 2010                         |
| <i>Cytisus striatus</i>           | 19.8 | Rodriguez-Riaño et al 1999                  |
| <i>Dalzellia zeylanica</i>        | 1159 | Sehgal et al 2011                           |
| <i>Dianthus caryophyllus</i>      | 3002 | Larsen et al 1995                           |
| <i>Downingia bacigalupii</i>      | 853  | Kaplan 1969                                 |
| <i>Echium vulgare</i>             | 590  | Melser et al 1997                           |
| <i>Eruca vesicaria</i>            | 275  | Cited in Sears 1937                         |
| <i>Eucalyptus globulus</i>        | 58.3 | Gore et al 1990                             |
| <i>Faramea occidentalis</i>       | 2183 | Travers 1999                                |
| <i>Ficus carica</i>               | 47.6 | Beck and Lord 1988                          |
| <i>Fumana</i>                     | 273  | Carrío and Guemes 2013                      |
| <i>Guihaiothamnus acaulis</i>     | 188  | Xie et al 2013                              |
| <i>Haberlea rhodopensis</i>       | 152  | Bogacheva-Milkoteva 2013                    |
| <i>Handroanthus ochraceus</i>     | 1617 | Oliveira, pers. comm.                       |
| <i>Handroanthus serratifolius</i> | 1617 | Oliveira, pers. comm.                       |
| <i>Hedyosmum brasiliense</i>      | 97.2 | Williams and Edwards, unpubl.               |
| <i>Hedyotis acutangula</i>        | 991  | Wu et al 2010                               |
| <i>Helleborus foetidus</i>        | 514  | Vesprini and Pacini 2000                    |
| <i>Heuchera micrantha</i>         | 181  | Rabe and Soltis 1999                        |
| <i>Hippophae rhamnoides</i>       | 20.9 | Mangla et al 2013                           |
| <i>Hymenaea</i>                   | 1667 | Gibbs et al 1999                            |
| <i>Ipomoea purpurea</i>           | 7450 | Shu-Mei Chang, pers. comm. 2014             |
| <i>Ipomopsis aggregata</i>        | 2409 | Sage et al 2006, Wolf et al 2001            |
| <i>Jathropa curcas</i>            | 915  | Abdelgadir et al 2012                       |
| <i>Lactoris fernandeziana</i>     | 40   | Bernardello et al 1999                      |
| <i>Lactuca sativa</i>             | 3085 | Einset 1944                                 |
| <i>Lagerstroemia indica</i>       | 1175 | Pounders et al 2006                         |
| <i>Lathyrus chloranthus</i>       | 271  | Herrick et al 1993                          |
| <i>Lathyrus odoratus</i>          | 321  | Herrick et al 1993                          |
| <i>Limnocharis</i>                | 467  | Hall 1902                                   |
| <i>Linaria</i>                    | 392  | Cited in Sears 1937                         |
| <i>Lupinus arizonicus</i>         | 442  | Wainwright 1978                             |
| <i>Magnolia grandiflora</i>       | 828  | Edwards, Rankin, and Williams, unpubl. 2014 |
| <i>Medicago rigidula</i>          | 82.2 | Sangduen et al 1983                         |
| <i>Medicago sativa</i>            | 192  | Barnes and Cleveland 1963                   |
| <i>Morinda parvifolia</i>         | 957  | Liu et al 2012                              |
| <i>Mussaenda kwangtungensis</i>   | 963  | Luo et al 2015                              |
| <i>Mussaenda shikokiana</i>       | 816  | Chen et al 2014                             |
| <i>Nemesia strumosa</i>           | 333  | Sears 1937                                  |

Reese and Williams 2019 – American Journal of Botany – Appendix S1

|                                    |       |                                                |
|------------------------------------|-------|------------------------------------------------|
| <i>Nivenia corymbosa</i>           | 873   | Goldblatt and Bernhardt 1990                   |
| <i>Nivenia stokeii</i>             | 1217  | Goldblatt and Bernhardt 1990                   |
| <i>Nuphar advena</i>               | 835   | Taylor and Williams, unpubl.                   |
| <i>Nyctanthes arbor tristis</i>    | 526   | Bhatnagar and Uma 1969                         |
| <i>Orchis anthropophora</i>        | 357   | Luca et al 2015                                |
| <i>Orchis italica</i>              | 357   | Luca et al 2015                                |
| <i>Oreocharis acaulis</i>          | 1318  | Guo et al 2013                                 |
| <i>Oroxylum indicum</i>            | 3000  | Gautam et al 2009                              |
| <i>Paeonia brownii</i>             | 20.8  | Bernhardt et al 2013                           |
| <i>Parthenium</i>                  | 1333  | Gerstel and Riner 1950                         |
| <i>Passiflora edulis</i>           | 2174  | Rego et al 2000                                |
| <i>Phalaenopsis</i>                | 208   | Zhang and O'Neill 1993                         |
| <i>Phoenix dactylifera</i>         | 315   | Reuveni et al 1986                             |
| <i>Platanthera</i>                 | 462   | Stickler et al 2013 (poster)                   |
| <i>Plumbago zeylanica</i>          | 12741 | Russell 1985                                   |
| <i>Polypleurum stylosum</i>        | 153   | Khosla et al 2000                              |
| <i>Potamogeton intortusifolius</i> | 267   | Zhang et al 2010                               |
| <i>Potamogeton perfoliatus</i>     | 1585  | Zhang et al 2010                               |
| <i>Potamogeton wrightii</i>        | 1483  | Zhang et al 2010                               |
| <i>Pseudopiptadenia</i>            | 39    | Pires and Freitas 2008                         |
| <i>Restrepia</i>                   | 99    | Millner et al 2015                             |
| <i>Schisandra sphenanthera</i>     | 88.9  | Du et al 2012                                  |
| <i>Silene vulgaris</i>             | 2323  | Glaeti 2006                                    |
| <i>Solanum chacoense</i>           | 396   | Liu et al 2012                                 |
| <i>Solanum laxum</i>               | 333   | Lewis and Crowe 1958                           |
| <i>Sorghum bicolor</i>             | 3638  | Heslop-Harrison et al 1984, Hodnett et al 2005 |
| <i>Spathodea campanulata</i>       | 4028  | Bittencourt et al 2003                         |
| <i>Sporobolus anglicus</i>         | 8943  | Li et al 2008                                  |
| <i>Thryptomene calycina</i>        | 320   | Beardsell et al 1993                           |
| <i>Ticodendron incognitum</i>      | 382   | Sogo and Tobe 2008                             |
| <i>Torenia baillonii</i>           | 3200  | Kikuchi et al 2007                             |
| <i>Torenia concolor</i>            | 1900  | Kikuchi et al 2007                             |
| <i>Trimezia</i>                    | 2000  | Bystedt and Vennigerholz 1991                  |
| <i>Vaccinium corybosum</i>         | 191   | Knight and Scott 1964                          |
| <i>Vaccinium myrtillus</i>         | 67.1  | Jacquemart and Thompson 1996                   |
| <i>Vaccinium uliginosum</i>        | 54.3  | Jacquemart and Thompson 1996                   |
| <i>Vaccinium vitis idaea</i>       | 98.6  | Jacquemart and Thompson 1996                   |
| <i>Zeyheria montana</i>            | 2554  | Bittencourt and Semir 2004                     |
| <i>Zeylanidium lichenoides</i>     | 354   | Chaudhary et al 2014, Sehgal et al 2014        |

## References

- Abdelgadir, H., S. Johnson, and J. Van Staden. 2012. Pollen viability, pollen germination and pollen tube growth in the biofuel seed crop *Jatropha curcas* (Euphorbiaceae). *South African Journal of Botany* 79:132-139.
- Aizen, M. A., and E. Raffaele. 1998. Flowering-shoot defoliation affects pollen grain size and postpollination pollen performance in *Alstroemeria aurea*. *Ecology* 79:2133-2142.
- Barnes, D., and R. Cleveland. 1963. Genetic evidence for nonrandom fertilization in alfalfa as influenced by differential pollen tube growth 1. *Journal of Crop Science* 3:295-297.
- Beardsell, D., R. Knox, and E. Williams. 1993. Breeding system and reproductive success of *Thryptomene calycina* (Myrtaceae). *Australian Journal of Botany* 41:333-353.
- Beck, N., and E. Lord. 1988. Breeding system in *Ficus carica*, the common fig. II. Pollination events. *American Journal of Botany* 75:1913-1922.
- Behrend, A., T. Borchert, A. Müller, J. Tänzer, and A. Hohe. 2013. Malformation of gynoecia impedes fertilisation in bud-flowering *Calluna vulgaris*. *Plant Biology* 15:226-232.
- Bernardello, G., G. J. Anderson, P. Lopez, M. A. Cleland, T. F. Stuessy, and D. J. Crawford. 1999. Reproductive biology of *Lactoris fernandeziana* (Lactoridaceae). *American Journal Of Botany* 86:829-840.
- Bernhardt, P., R. Meier, and N. Vance. 2013. Pollination ecology and floral function of Brown's peony (*Paeonia brownii*) in the Blue Mountains of northeastern Oregon. *Journal of Pollination Ecology* 2:9-20.
- Bhardwaj, V., and R. Tandon. 2013. Self-incompatibility and post-fertilization maternal regulation cause low fecundity in *Aegle marmelos* (Rutaceae). *Botanical Journal of the Linnean Society* 172:572-585.
- Bhatnagar, S. P., and M. C. Uma. 1969. The structure of style and stigma in some Tubiflorae. *Phytomorphology* 19:99-109.
- Bittencourt Jr, N. S., E. J. Pereira Jr, P. de Souza São-Thiago, and J. Semir. 2011. The reproductive biology of *Cybistax antisiphilitica* (Bignoniaceae), a characteristic tree of the South American savannah-like “Cerrado” vegetation. *Flora-Morphology, Distribution, Functional Ecology of Plants* 206:872-886.
- Bittencourt, N. S., and J. Semir. 2004. Pollination biology and breeding system of *Zeyheria montana* (Bignoniaceae). *Plant Systematics and Evolution* 247:241-254.
- Bittencourt, N. S. J., P. E. Gibbs, and J. Semir. 2003. Histological study of post-pollination events in *Spathodea campanulata* Beauv. (Bignoniaceae), a species with late-acting self-incompatibility. *Annals of Botany* 91:827-834.
- Bogacheva-Milkoteva, K., E. Kozuharova, R. Claßen-Bockhoff, and A. Gogala. 2013. Pollination ecology of *Haberlea rhodopensis* Friv. (Gesneriaceae), a Tertiary relict endemic to the Balkan Peninsula. *Journal Comptes rendus de l'Académie bulgare des Sciences* 66.
- Bystedt, P. A., and F. Vennigerholz. 1991. The transmitting tract in *Trimezia fosteriana* (Iridaceae). III. Pollen tube growth in the stigma, style and ovary. *Nordic Journal of Botany* 11:459-464.
- Carrió, E., and J. Güemes. 2013. The role of a mixed mating system in the reproduction of a Mediterranean subshrub (*Fumana hispidula*, Cistaceae). *Journal of Plant Research* 126:33-40.

Reese and Williams 2019 – American Journal of Botany – Appendix S1

- Carrió, E., and J. Güemes. 2014. The effectiveness of pre-and post-zygotic barriers in avoiding hybridization between two snapdragons (*Antirrhinum* L.: Plantaginaceae). 176:159-172.
- Chaudhary, A., P. Khanduri, R. Tandon, P. Uniyal, and H. M. Ram. 2014. Central cell degeneration leads to three-celled female gametophyte in *Zeylanidium lichenoides* Engl. (Podostemaceae). *South African Journal of Botany* 91:99-106.
- Chen, S., Z. Luo, and D. Zhang. 2014. Pre-and post-zygotic reproductive isolation between co-occurring *Mussaenda pubescens* var. *alba* and *M. shikokiana* (Rubiaceae). *Journal of Integrative Plant Biology* 56:411-419.
- de Assis Pires, J. P., and L. Freitas. 2008. Reproductive biology of two tree species of Leguminosae in a Montane Rain Forest in southeastern Brazil. *Flora-Morphology, Distribution, Functional Ecology of Plants* 203:491-498.
- de Jeu, M. J., F. G. Caldere, and J. L. van Went. 1996. Sporogenesis, gametogenesis, and progamic phase in *Alstroemeria*. *Canadian Journal of Botany* 74:1354-1361.
- Distefano, G., A. Hedhly, G. Las Casas, S. La Malfa, M. Herrero, and A. Gentile. 2012. Male–female interaction and temperature variation affect pollen performance in *Citrus*. *Scientia Horticulturae* 140:1-7.
- dos Santos, A. P. M., C. M. Fracasso, M. Luciene dos Santos, R. Romero, M. Sazima, and P. E. Oliveira. 2012. Reproductive biology and species geographical distribution in the Melastomataceae: a survey based on New World taxa. *Annals of Botany* 110:667-679.
- Du, W., L. J. Huang, and X. F. Wang. 2012. Deceit pollination and the effect of deforestation on reproduction in dioecious *Schisandra sphenanthera* (Schisandraceae) in central China. *Journal of Systematics and Evolution* 50:36-44.
- Einset, J. 1944. Cytological basis for sterility in induced autotetraploid lettuce (*Lactuca sativa* L.). *American Journal of Botany* :336-342.
- Fenster, C. B., and V. L. Sork. 1988. Effect of crossing distance and male parent on *in vivo* pollen tube growth in *Chamaecrista fasciculata*. *American Journal of Botany* 75:1898-1903.
- Gao, C., D. Yuan, Y. Yang, B. Wang, D. Liu, and F. Zou. 2015. Pollen tube growth and double fertilization in *Camellia oleifera*. *Journal of the American Society for Horticultural Science* 140:12-18.
- Gautam, M., R. Tandon, and H. M. Ram. 2009. Pollination ecology and breeding system of *Oroxylum indicum* (Bignoniaceae) in the foothills of the Western Himalaya. *Journal of Tropical Ecology* 25:93-96.
- Geetha, K., A. Kawane, A. K. Bishoyi, A. Phurailatpam, C. Ankita, S. Malik, R. Srinivasan, and S. Bhat. 2013. Characterization of mode of reproduction in *Commiphora wightii* [(Arnot) Bhandari] reveals novel pollen–pistil interaction and occurrence of obligate sexual female plants. *Trees* 27:567-581.
- Gerstel, D. U., and M. E. Riner. 1950. Self-Incompatibility studies in *Guayule* .1. Pollen-tube behavior. *Journal of Heredity* 41:49-55.
- Gibbs, P. E., P. E. Oliveira, and M. B. Bianchi. 1999. Postzygotic control of selfing in *Hymenaea stigonocarpa* (Leguminosae-Caesalpinioideae), a bat-pollinated tree of the Brazilian Cerrados. *International Journal of Plant Sciences* 160:72-78.
- Glaettli, M., and J. Goudet. 2006. Variation in the intensity of inbreeding depression among successive life-cycle stages and generations in gynodioecious *Silene vulgaris* (Caryophyllaceae). *Journal of Evolutionary Biology* 19:1995-2005.

Reese and Williams 2019 – American Journal of Botany – Appendix S1

- Goldblatt, P., and P. Bernhardt. 1990. Pollination biology of *Nivenia* (Iridaceae) and the presence of heterostylous self-compatibility. *Israeli Journal of Plant Sciences* 39:93-111.
- Gontijo, S. L., A. R. Barbosa, M. C. de Melo, and E. L. Borba. 2010. Occurrence of different sites of self-incompatibility reaction in four *Anathallis* (Orchidaceae, Pleurothallidinae) species. *Plant Species Biology* 25:129-135.
- Gore, P. L., B. M. Potts, P. W. Volker, and J. Megalos. 1990. Unilateral cross-incompatibility in *Eucalyptus*: the case of hybridization between *E. globulus* and *E. nitens*. *Australian Journal of Botany* 38:383-394.
- Gribel, R., P. E. Gibbs, and A. L. Queiróz. 1999. Flowering phenology and pollination biology of *Ceiba pentandra* (Bombacaceae) in Central Amazonia. *Journal of Tropical Ecology* 15:247-263.
- Guo, Y.-F., Y.-Q. Wang, and A. Weber. 2013. Floral ecology of *Oreocharis acaulis* (Gesneriaceae): An exceptional case of “preanthetic” protogyny combined with approach herkogamy. *Flora-Morphology, Distribution, Functional Ecology of Plants* 208:58-67.
- Hall, J. G. 1902. An embryological study of *Limnocharis emarginata*. *Botanical Gazette* 33:214-219.
- Herrick, J., B. Murray, and K. Hammett. 1993. Barriers preventing hybridisation of *Lathyrus odoratus* with *L. chloranthus* and *L. chrysanthus*. *New Zealand Journal of Crop Horticultural Science* 21:115-121.
- Heslop-Harrison, Y., B. Reger, and J. Heslop-Harrison. 1984. The pollen-stigma interaction in the grasses. 6. The stigma (‘silk’) of *Zea mays* L. as host to the pollens of *Sorghum bicolor* (L.) Moench and *Pennisetum americanum* (L.) Leeke. *Acta Botanica Neerlandica* 33:205-227.
- Hiroi, K., M. Sone, S. Sakazono, M. Osaka, H. Masuko-Suzuki, T. Matsuda, G. Suzuki, K. Suwabe, and M. Watanabe. 2013. Time-lapse imaging of self-and cross-pollinations in *Brassica rapa*. *Annals of Botany* 112:115-122.
- Hodnett, G. L., B. L. Burson, W. L. Rooney, S. L. Dillon, and H. J. Price. 2005. Pollen-pistil interactions result in reproductive isolation between *Sorghum bicolor* and divergent *Sorghum* species. *Crop science* 45:1403-1409.
- Hove, A. A., and S. J. Mazer. 2013. Pollen performance in *Clarkia* taxa with contrasting mating systems: implications for male gametophytic evolution in selfers and outcrossers. *Plants* 2:248-278.
- Jacquemart, A.-L., and J. Thompson. 1996. Floral and pollination biology of three sympatric *Vaccinium* (Ericaceae) species in the Upper Ardennes, Belgium. *Canadian Journal of Botany* 74:210-221.
- Johnson, M. A., D. K. Price, J. P. Price, and E. A. Stacy. 2015. Postzygotic barriers isolate sympatric species of *Cyrtandra* (Gesneriaceae) in Hawaiian montane forest understories. *American Journal Of Botany* 102:1870-1882.
- Johnson, S. D., A. Jürgens, and M. Kuhlmann. 2012. Pollination function transferred: modified tepals of *Albuca* (Hyacinthaceae) serve as secondary stigmas. *Annals of Botany* 110:565-572.
- Kaplan, D. R. 1969. Sporogenesis and gametogenesis in *Dowlingia* (Campanulaceae; Loelioideae). *Bulletin of the Torrey Botanical Club* 96:418-434.
- Khosla, C., K. Shivanna, and H. M. Ram. 2000. Reproductive biology of *Polypleurum stylosum* (Podostemaceae). *Journal of Aquatic Botany* 67:143-154.

Reese and Williams 2019 – American Journal of Botany – Appendix S1

- Kikuchi, S., H. Kino, H. Tanaka, and H. Tsujimoto. 2007. Pollen tube growth in cross combinations between *Torenia fournieri* and fourteen related species. *Breeding Science* 57:117-122.
- Knight Jr, R., and D. Scott. 1964. Effects of temperatures on self-and cross-pollination and fruiting of four highbush blueberry varieties. *Proceedings of the American Society for Horticultural Science*.
- Larsen, P. B., E. N. Ashworth, M. L. Jones, and W. R. Woodson. 1995. Pollination-induced ethylene in carnation (role of pollen tube growth and sexual compatibility). *Plant Physiology* 108:1405-1412.
- Lewis, D., and L. K. Crowe. 1958. Unilateral interspecific incompatibility in flowering plants. *Heredity* 12:233-256.
- Li, H., S. An, Y. Zhi, C. Yan, L. Zhao, C. Zhou, Z. Deng, W. Su, and Y. Liu. 2008. Protogynous, pollen limitation and low seed production reasoned for the dieback of *Spartina anglica* in coastal China. *Plant Science* 174:299-309.
- Liu, B., N. Boivin, D. Morse, and M. Cappadocia. 2012. A time course of GFP expression and mRNA stability in pollen tubes following compatible and incompatible pollinations in *Solanum chacoense*. *Sexual Plant Reproduction* 25:205-213.
- Liu, J., H. Zhang, Y. Cheng, S. Kafkas, and M. Güney. 2014. Pistillate flower development and pollen tube growth mode during the delayed fertilization stage in *Corylus heterophylla* Fisch. *Plant Reproduction* 27:145-152.
- Liu, Y., Z. L. Luo, X. Q. Wu, X. F. Bai, and D. X. Zhang. Functional dioecy in *Morinda parvifolia* (Rubiaceae), a species with stigma-height dimorphism. *Plant Systematics and Evolution* 298:775-785.
- Luca, A., A. Palermo, F. Bellusci, and G. Pellegrino. 2015. Pollen competition between two sympatric *Orchis* species (Orchidaceae): the overtaking of conspecific of heterospecific pollen as a reproductive barrier. *Plant Biology* 17:219-225.
- Luo, Y., L. Lu, A. H. Wortley, D.-Z. Li, H. Wang, and S. Blackmore. 2015. Evolution of angiosperm pollen. 3. Monocots. *Annals of the Missouri Botanical Garden* 101:406-455.
- Mahy, G., and A. L. Jacquemart. 1999. Early inbreeding depression and pollen competition in *Calluna vulgaris* (L.) Hull. *Annals of Botany* 83:697-704.
- Mangla, Y., R. Tandon, S. Goel, and S. Raina. 2013. Structural organization of the gynoecium and pollen tube path in Himalayan sea buckthorn, *Hippophae rhamnoides* (Elaeagnaceae). *AoB Plants* 5.
- Matsumoto, Y., M. Miyagi, N. Watanabe, and T. Kuboyama. 2012. Temperature-dependent enhancement of pollen tube growth observed in interspecific crosses between wild *Cucumis spp.* and melon (*C. melo* L.). *Scientia Horticulturae* 138:144-150.
- Melser, C., M. C. Rademaker, and P. G. Klinkhamer. 1997. Selection on pollen donors by *Echium vulgare* (Boraginaceae). *Sexual Plant Reproduction* 10:305-312.
- Millner, H. J., A. R. McCrea, and T. C. Baldwin. 2015. An investigation of self-incompatibility within the genus *Restrepia*. *American Journal Of Botany* 102:487-494.
- Moritz, A., and P. Ludders. 1993. Pollen germination, pollen-tube growth and fertilization behavior of different Brazil nut clones (*Bertholletia excelsa* Humb And Bonpl). *Angewandte Botanik* 67:107-112.
- Nghiem, Q., J. Harbard, C. Harwood, A. Griffin, T. Ha, and A. Koutoulis. 2013. Pollen-pistil interactions between autotetraploid and diploid *Acacia mangium* and diploid *A. auriculiformis*. *Journal of Tropical Forest Science*:96-110.

Reese and Williams 2019 – American Journal of Botany – Appendix S1

- Patil, P., S. K. Malik, K. S. Negi, J. John, S. Yadav, G. Chaudhari, and K. V. Bhat. 2013. Pollen germination characteristics, pollen-pistil interaction and reproductive behaviour in interspecific crosses among *Abelmoschus esculentus* Moench and its wild relatives. *Grana* 52:1-14.
- Pounders, C., S. Reed, and M. Pooler. 2006. Pollination biology of *Lagerstroemia indica* and several interspecific hybrids. *HortScience* 413:575-578.
- Rabe, A. J., and D. E. Soltis. 1999. Pollen tube growth and self-incompatibility in *Heuchera micrantha* var. *diversifolia* (Saxifragaceae). *International Journal of Plant Sciences* 160:1157-1162.
- Radford, A. E., H. E. Ahles, and C. R. Bell. 1968. Manual of the vascular flora of the Carolinas. University of North Carolina Press, Chapel Hill, NC:.
- Ramstetter, J., and D. Mulcahy. 1986. Pollen competition in *Aureolaria pedicularia*. Pages 411-416 *Biotechnology and Ecology of Pollen*. Springer.
- Reed, S. M. 2004. Self-incompatibility in *Cornus florida*. *HortScience* 39:335-338.
- Rêgo, M., E. Rêgo, C. Bruckner, E. Da Silva, F. Finger, and K. Pereira. 2000. Pollen tube behavior in yellow passion fruit following compatible and incompatible crosses. *Theoretical and Applied Genetics* 101:685-689.
- Reuveni, O., S. Abu, and S. Golobovitz. 1985. Date palm pollen germination and tube elongation on pistillate flowers cultured at different temperatures. Pages 91-96 in Symposium on Physiology of Productivity of Subtropical and Tropical Tree Fruits 175.
- Rodríguez-Riaño, T., A. Ortega-Olivencia, and J. A. Devesa. 1999. Reproductive biology in two Genisteeae (Papilionoideae) endemic of the western Mediterranean region: *Cytisus striatus* and *Retama sphaerocarpa*. *Canadian Journal of Botany* 77:809-820.
- Russell, S. D. 1985. Preferential fertilization in *Plumbago* - Ultrastructural evidence for gamete-level recognition in an angiosperm. *Proceedings Of The National Academy Of Sciences Of The United States Of America* 82:6129-6132.
- Sage, T. L., M. V. Price, and N. M. Waser. 2006. Self-sterility in *Ipomopsis aggregata* (Polemoniaceae) is due to prezygotic ovule degeneration. *American Journal Of Botany* 93:254-262.
- Sangduen, N., E. L. Sorensen, and G. H. Liang. 1983. Pollen germination and pollen tube growth following self-pollination and intra- and interspecific pollination of *Medicago* species. *Euphytica* 32:527-534.
- Sears, E. R. 1937. Cytological phenomena connected with self-sterility in the flowering plants. *Genetics* 22:130.
- Sedgley, M., and M. Buttrose. 1978. Some effects of light intensity, daylength and temperature on flowering and pollen tube growth in the watermelon (*Citrullus lanatus*). *Annals of botany* 42:609-616.
- Sehgal, A., J. P. Khurana, M. Sethi, and H. Ara. 2011. Occurrence of unique three-celled megagametophyte and single fertilization in an aquatic angiosperm-*Dalzellia zeylanica* (Podostemaceae-Tristichoideae). *Sexual Plant Reproduction* 24:199-210.
- Sehgal, A., N. Mann, and H. M. Ram. 2014. Structural and developmental variability in the female gametophyte of *Griffithella hookeriana*, *Polypleurum stylosum*, and *Zeylanidium lichenoides* and its bearing on the occurrence of single fertilization in Podostemaceae. *Plant reproduction* 27:205-223.



Reese and Williams 2019 – American Journal of Botany – Appendix S1

- Sogo, A., and H. Tobe. 2008. Mode of pollen tube growth in pistils of *Ticodendron incognitum* (Ticodendraceae, Fagales) and the evolution of chalazogamy. *Botanical Journal of the Linnean Society* 157:621-631.
- Sunnichan, V. G., H. Y. M. Ram, and K. R. Shivanna. 2005. Reproductive biology of *Boswellia serrata*, the source of salai guggul, an important gum-resin. *Botanical Journal of the Linnean Society* 147:73-82.
- Traub, H. P., and C. T. O'Rork. 1939. Course of pollen tube growth in *Carica papaya* and *Cucurbita* spp. *Nature* 143:562-562.
- Travers, S. E. 1999. Environmental effects on components of pollen performance in *Faramea occidentalis* (L.) A. Rich. (Rubiaceae) 1. *Biotropica* 31:159-166.
- Tucker, S. C. 1996. Trends in evolution of floral ontogeny in *Cassia sensu stricto*, *Senna*, and *Chamaecrista* (Leguminosae: Caesalpinioideae: Cassieae: Cassiinae); a study in convergence. *American Journal Of Botany* 83:687-711.
- Valtueña, F. J., T. Rodríguez-Riaño, F. Espinosa, and A. Ortega-Olivencia. 2010. Self-sterility in two *Cytisus* species (Leguminosae, Papilionoideae) due to early-acting inbreeding depression. *American Journal Of Botany* 97:123-135.
- van Ryn, D., J. Lassoie, and J. Jacobson. 1988. Effects of acid mist on in vivo pollen tube growth in red maple. *Canadian Journal of Forest Research* 18:1049-1052.
- Vesprini, J. L., and E. Pacini. 2000. Breeding systems in two species of the genus *Helleborus* (Ranunculaceae). *Plant Biosystems* 134:193-197.
- von Haselberg, C., P. Ludders, and R. Stosser. 2004. Pollen tube growth, fertilization and ovule longevity in the carob tree (*Ceratonia siliqua* L.). *Angew. Bot* 78:32-40.
- Wainwright, C. M. 1978. Floral biology and pollination ecology of two desert Lupines. *Bulletin of the Torrey Botanical Club* 105:24-38.
- Williams, J. H. 2012. Pollen tube growth rates and the diversification of flowering plant reproductive cycles. *International Journal of Plant Sciences* 173:649-661.
- Wolf, P. G., D. R. Campbell, N. M. Waser, S. D. Sipes, T. R. Toler, and J. K. Archibald. 2001. Tests of pre- and postpollination barriers to hybridization between sympatric species of *Ipomopsis* (Polemoniaceae). *American Journal Of Botany* 88:213-219.
- Wu, X., A. Li, and D. Zhang. 2010. Cryptic self-incompatibility and distyly in *Hedyotis acutangula* Champ. (Rubiaceae). *Journal of Plant Biology* 12:484-494.
- Xie, P. W., Z. L. Luo, and D. X. Zhang. 2013. Syrphid fly pollination of *Guihaiiothamnus acaulis* (Rubiaceae), a species with “butterfly” flowers. *Journal of Systematics and Evolution* 51:86-93.
- Zhang, X. L., R. W. Gituru, C. F. Yang, and Y. H. Guo. 2010. Exposure to water increased pollen longevity of pondweed (*Potamogeton* spp.) indicates different mechanisms ensuring pollination success of angiosperms in aquatic habitat. *Evolutionary Ecology* 24:939-953.
- Zhang, X. S., and S. D. O'Neill. 1993. Ovary and gametophyte development are coordinately regulated by auxin and ethylene following pollination. *Plant Cell* 5:403-418.

**Appendix S2: Pollen tube growth rate (PTGR) evolution across Spermatophytes.** Contour plot showing reconstructed history of *PTGR*. Cool colors indicate *PTGR*s closer to the minimum value in seed plants while warm colors indicate *PTGR*s closer to the maximum value in seed plants. Scale bar indicates millions of years before present.

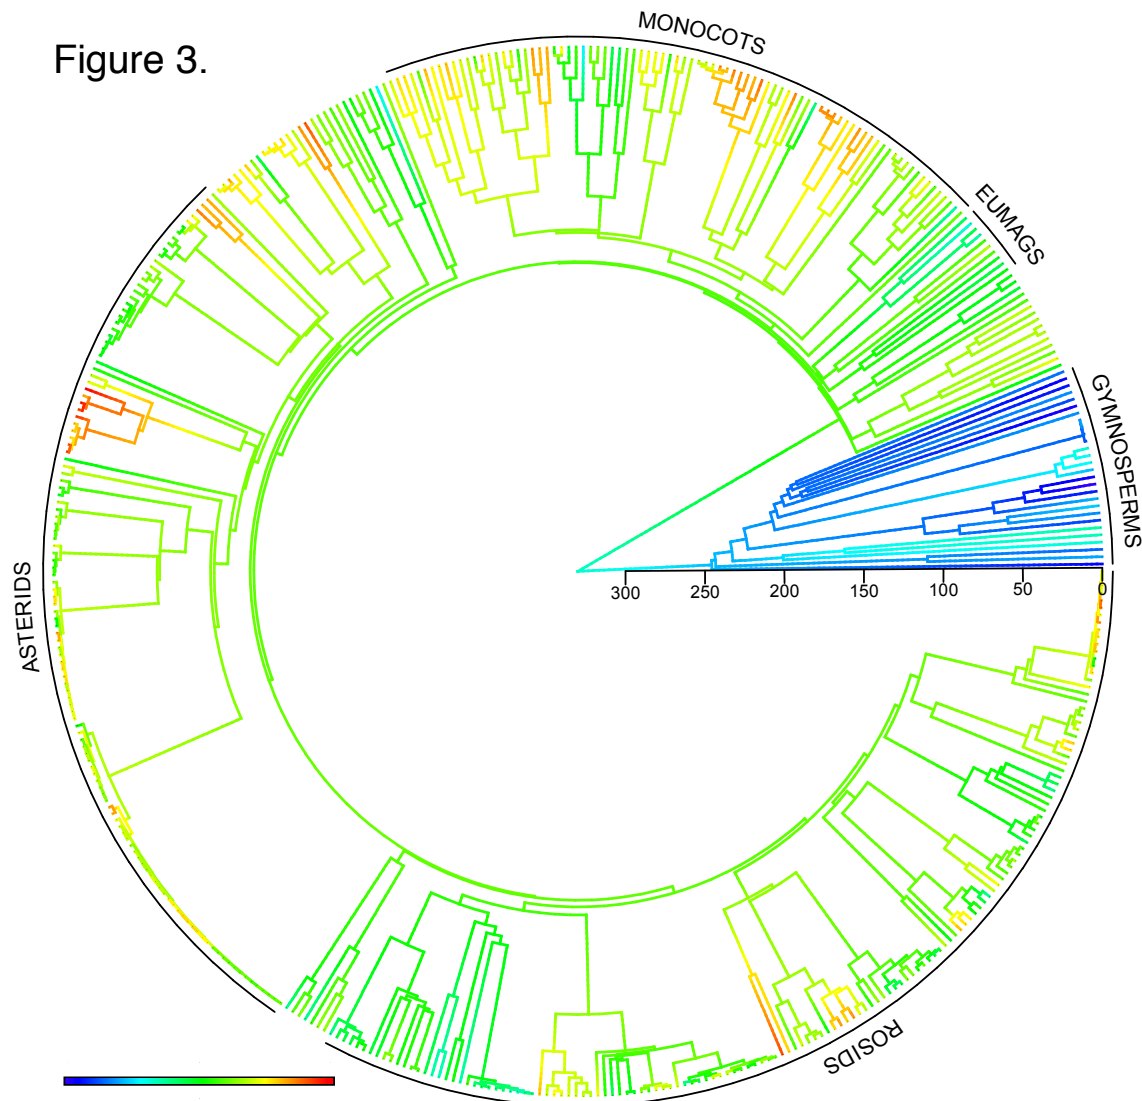

Reese and Williams 2019 – American Journal of Botany – Appendix S3

**Appendix S3: Summary statistics for pollen tube growth rate (*PTGR*) of *Magnolia grandiflora*.**

| <b>Statistic</b>             | <b><i>PTGR</i></b>          |
|------------------------------|-----------------------------|
| raw mean ( $N = 25$ crosses) | 827.6 $\mu\text{m h}^{-1}$  |
| raw SD ( $N = 25$ )          | 141.3 $\mu\text{m h}^{-1}$  |
| raw CV                       | 0.1708                      |
| Log(10) mean                 | 2.912 $\mu\text{m h}^{-1}$  |
| transformed SD               | 0.0689 $\mu\text{m h}^{-1}$ |
| transformed CV               | 0.0237                      |

Reese and Williams 2019 – American Journal of Botany – Appendix S4

**Appendix S4: Sensitivity analysis for the magnitude of  $\log_{10}$  *PTGR* error estimates.** Values in each column represent model weights from separate analyses of angiosperm diploids ( $N = 138$ ) vs. polyploids ( $N = 68$ ). Column headings indicate the coefficient of variation (CV), ranging from zero to 0.50, used to calculate estimated species-specific standard deviations around *PTGRs* in each analysis. The best-fitting model at each CV is indicated in bold. <sup>a</sup>, Empirically-determined CV of *Magnolia grandiflora*.

| Model | Coefficient of Variation |                     |              |              |              |              |
|-------|--------------------------|---------------------|--------------|--------------|--------------|--------------|
|       | 0.00                     | 0.0237 <sup>a</sup> | 0.05         | 0.10         | 0.25         | 0.50         |
| OUMV  | <b>0.376</b>             | <b>0.373</b>        | <b>0.459</b> | <b>0.461</b> | 0.119        | 0.045        |
| OUMA  | 0.363                    | 0.333               | 0.307        | N/A          | 0.172        | 0.070        |
| OUM   | 0.157                    | 0.174               | 0.137        | 0.309        | 0.212        | 0.080        |
| OU1   | 0.104                    | 0.120               | 0.097        | 0.230        | <b>0.390</b> | 0.188        |
| BM1   | 1.74E-31                 | 1.77E-25            | 3.20E-20     | 4.58E-14     | 0.089        | <b>0.528</b> |
| BMS   | 5.45E-32                 | 5.52E-26            | 4.81E-24     | 1.30E-12     | 0.017        | 0.089        |

Reese and Williams 2019 – American Journal of Botany – Appendix S5

**Appendix S5: *PTGR* evolution in gymnosperms vs. angiosperms.** Selective regime 1 represents gymnosperms ( $N = 28$ ) and selective regime 2 represents angiosperms ( $N = 423$ ). Models representing <1% of the model weight are excluded.

| model                 | $\Delta AIC_c$ | model weight | sigma sq1 | alpha1 | sigma sq2 | alpha2 | optimum1 | se1   | optimum2 | se2   |
|-----------------------|----------------|--------------|-----------|--------|-----------|--------|----------|-------|----------|-------|
| <b>OUMV</b>           | (822.1)        | 0.338        | 0.091     | 0.122  | 0.139     | 0.122  | 0.187    | 0.123 | 2.690    | 0.048 |
| <b>OUM</b>            | 0.040          | 0.332        | 0.137     | 0.124  | 0.137     | 0.124  | 0.188    | 0.150 | 2.690    | 0.047 |
| <b>OUMA</b>           | 0.051          | 0.330        | 0.091     | 0.120  | 0.091     | 0.123  | 0.187    | 0.123 | 2.690    | 0.048 |
| <b>AVERAGED MODEL</b> |                | ~1           | 0.106     | 0.122  | 0.122     | 0.123  | 0.187    | 0.132 | 2.690    | 0.048 |

Reese and Williams 2019 – American Journal of Botany – Appendix S6

**Appendix S6: C-value evolution in gymnosperms vs. angiosperms.** Selective regime 1 represents gymnosperms ( $N = 23$ ) and selective regime 2 represents angiosperms ( $N = 161$ ). Models representing <1% of the model weight are excluded.

| model                 | $\Delta AICc$ | model weight | sigma sq1 | alpha1 | sigma sq2 | alpha2 | optimum1 | se1   | optimum2 | se2   |
|-----------------------|---------------|--------------|-----------|--------|-----------|--------|----------|-------|----------|-------|
| OUMV                  | (172.4)       | 0.502        | 0.007     | 0.095  | 0.005     | 0.095  | 1.231    | 0.041 | 0.184    | 0.051 |
| OUMA                  | 0.02          | 0.498        | 0.006     | 0.085  | 0.006     | 0.096  | 1.231    | 0.042 | 0.184    | 0.051 |
| <b>AVERAGED MODEL</b> |               | ~1           | 0.007     | 0.09   | 0.005     | 0.095  | 1.231    | 0.041 | 0.184    | 0.051 |

Reese and Williams 2019 – American Journal of Botany – Appendix S7

### Appendix S7: Closely-related taxon analyses.

#### Appendix S7a. Closely-related species pairs extracted from ploidy dataset. *PTGRs* in $\mu\text{m h}^{-1}$ .

Binomial test ( $P = 0.623$ ;  $N = 10$ ).

| DIPLOID<br>TAXON               | POLYPLOID<br>TAXON           | DIPLOID<br><i>PTGR</i> | POLYPLOID<br><i>PTGR</i> | FASTER<br>TAXON |
|--------------------------------|------------------------------|------------------------|--------------------------|-----------------|
| <i>Anagallis arvensis</i>      | <i>Anagallis monelli</i>     | 233.33                 | 105.56                   | diploid         |
| <i>Hemerocallis thunbergii</i> | <i>Hemerocallis fulva</i>    | 4166.67                | 6266.67                  | polyploid       |
| <i>Ipomoea purpurea</i>        | <i>Ipomoea batatas</i>       | 7450                   | 4625                     | diploid         |
| <i>Iris mandshurica</i>        | <i>Iris pseudacorus</i>      | 278.65                 | 4255.50                  | polyploid       |
| <i>Lythrum junceum</i>         | <i>Lythrum salicaria</i>     | 722.22                 | 493.60                   | diploid         |
| <i>Medicago rigidula</i>       | <i>Medicago sativa</i>       | 82.23                  | 192.17                   | polyploid       |
| <i>Prunus avium</i>            | <i>Prunus domestica</i>      | 260.88                 | 177.5                    | diploid         |
| <i>Tabebuia rosea</i>          | <i>Tabebuia chrysotricha</i> | 1111.11                | 1342.45                  | polyploid       |
| <i>Trifolium pratense</i>      | <i>Trifolium polymorphum</i> | 103.89                 | 444.44                   | polyploid       |
| <i>Ulmus pumila</i>            | <i>Ulmus americana</i>       | 56.25                  | 56.25                    | equivocal       |

Reese and Williams 2019 – American Journal of Botany – Appendix S’/

**Appendix S7b. Intraspecific diploid-polyploid cytotypes taken from the literature.** All are autopolyploids. Binomial test,  $N = 11$ ,  $P = 0.0020$ . Percent difference is calculated relative to the diploid.

| REF.  | TAXON                              | DIPLOID<br>PTGR                                                | POLYPLOID<br>PTGR      | POLYPLOID<br>+/- (% DIFF) |
|-------|------------------------------------|----------------------------------------------------------------|------------------------|---------------------------|
| 1     | <i>Beta vulgaris</i><br>2x,4x      | 241.2 $\mu\text{m/h}$                                          | 142.7 $\mu\text{m/h}$  | slower (-69%)             |
| 2     | <i>Cucumis melo</i><br>2x,4x       | “no difference”                                                |                        | equivocal                 |
| 3     | <i>Datura stramonium</i> 2x,4x     | 2953.7 $\mu\text{m/h}$                                         | 2812.5 $\mu\text{m/h}$ | slower (-4.8%)            |
| 4     | <i>Lactuca sativa</i><br>2x,4x     | “faster”                                                       | “slower”               | slower                    |
| 5     | <i>Malus domestica</i><br>2x,4x    | 3.8 units/96 h                                                 | 3.1 units/96 h         | slower (-18.4%)           |
| 6     | <i>Malus domestica</i><br>2x,3x    | 682 $\mu\text{m/h}$                                            | 465 $\mu\text{m/h}$    | slower (-31.8%)           |
| 7     | <i>Secale cereale</i><br>2x,4x     | 12.24 units/h                                                  | 12.08 units/h          | slower (-1.3%)            |
| 8     | <i>Solanum sp.</i> 2x,4x           | “faster”                                                       | “slower”               | slower                    |
| 9     | <i>Trifolium pratense</i><br>2x,4x | 2322 $\mu\text{m/h}$                                           | 1950 $\mu\text{m/h}$   | slower (-16%)             |
| 10,11 | <i>Zea mays</i> 2x,4x              | Slower pollen germination and<br>pollen tube growth rate in 4x |                        | slower                    |

### References

1. **Matsumura S, Mochizuki A. 1953.** Improvement of sugar beet by means of induced triploidy. *The Japanese Journal of Genetics* **28**(2): 47-56.
2. **Susin I, Álvarez JM. 1997.** Fertility and pollen tube growth in polyploid melons (*Cucumis melo* L.). *Euphytica* **93**(3): 369-373.
3. **Buchholz JT, Blakeslee AF. 1929.** Pollen-tube growth in crosses between balanced chromosomal types of *Datura stramonium*. *Genetics* **14**: 538-568.



Reese and Williams 2019 – American Journal of Botany – Appendix S'

4. **Einset J. 1944.** Cytological basis for sterility in induced autotetraploid lettuce (*Lactuca sativa* L.). *American Journal of Botany*: 336-342.
5. **Adachi Y, Komori S, Hoshikawa Y, Tanaka N, Abe K, Bessho H, Watanabe M, Suzuki A. 2009.** Characteristics of fruiting and pollen tube growth of apple autotetraploid cultivars showing self-compatibility. *Journal of the Japanese Society for Horticultural Science* **78**(4): 402-409.
6. **Modlibowska I. 1945.** *Pollen tube growth and embryo-sac development in apples and pears*. Ph.D. dissertation, University of London, London.
7. **Chin T. 1943.** Cytology of the autotetraploid rye. *Botanical Gazette* **104**(4): 627-632.
8. **Modlibowska I. 1945.** *Pollen tube growth and embryo-sac development in apples and pears*. Ph.D. dissertation, University of London, London.
9. **Evans AM. 1962.** Species hybridization in *Trifolium*. 2. Investigating pre-fertilization barriers to compatibility. *Euphytica* **11**(3): 256-262.
10. **Randolph L. 1935.** Cytogenetics of tetraploid maize. *J. agric. Res* **50**: 591-605.
11. **Green JM. 1946.** Comparative rates of pollen tube establishment in diploid and tetraploid maize. *Journal of Heredity* **37**(4): 117-121.

Reese and Williams 2019 – American Journal of Botany – Appendix S8

**Appendix S8: Phylogenetic ANCOVA results.** Models comprising <1% of the model weight are excluded.

**Appendix S8a: Angiosperms only ( $N = 100$ ).**

| <b>Full model</b> |               |                                        |                                       |                                            |
|-------------------|---------------|----------------------------------------|---------------------------------------|--------------------------------------------|
| <u>Model</u>      | <u>Weight</u> | <u><math>P_{C\text{-value}}</math></u> | <u><math>P_{\text{ploidy}}</math></u> | <u><math>P_{\text{interaction}}</math></u> |
| kappa             | 0.688         | 0.028                                  | 0.565                                 | 0.334                                      |
| OU                | 0.287         | 0.005                                  | 0.679                                 | 0.414                                      |
| lambda            | 0.025         | 0.076                                  | 0.867                                 | 0.626                                      |

Model averaged slope for C-value:  $0.399 \pm 0.167$

| <b>No interaction</b> |               |                                        |                                       |
|-----------------------|---------------|----------------------------------------|---------------------------------------|
| <u>Model</u>          | <u>Weight</u> | <u><math>P_{C\text{-value}}</math></u> | <u><math>P_{\text{ploidy}}</math></u> |
| kappa                 | 0.652         | 0.046                                  | 0.748                                 |
| OU                    | 0.313         | 0.006                                  | 0.895                                 |
| lambda                | 0.035         | 0.083                                  | 0.979                                 |

Model averaged slope for C-value:  $0.344 \pm 0.153$

| <b>C-value only</b> |               |                                        |
|---------------------|---------------|----------------------------------------|
| <u>Model</u>        | <u>Weight</u> | <u><math>P_{C\text{-value}}</math></u> |
| kappa               | 0.642         | 0.045                                  |
| OU                  | 0.322         | 0.005                                  |
| lambda              | 0.036         | 0.079                                  |

Model averaged slope for C-value:  $0.344 \pm 0.153$

**Appendix S8b: All seed plants ( $N = 118$ ).**

| <b>Full model</b> |               |                                        |                                       |                                            |
|-------------------|---------------|----------------------------------------|---------------------------------------|--------------------------------------------|
| <u>Model</u>      | <u>Weight</u> | <u><math>P_{C\text{-value}}</math></u> | <u><math>P_{\text{ploidy}}</math></u> | <u><math>P_{\text{interaction}}</math></u> |
| kappa             | 0.998         | 0.080                                  | 0.486                                 | 0.624                                      |

Slope for C-value:  $0.288 \pm 0.163$

| <b>No interaction</b> |               |                                        |                                       |
|-----------------------|---------------|----------------------------------------|---------------------------------------|
| <u>Model</u>          | <u>Weight</u> | <u><math>P_{C\text{-value}}</math></u> | <u><math>P_{\text{ploidy}}</math></u> |
| kappa                 | 0.997         | 0.092                                  | 0.562                                 |

Slope for C-value:  $0.263 \pm 0.155$

| <b>C-value only</b> |               |                                        |
|---------------------|---------------|----------------------------------------|
| <u>Model</u>        | <u>Weight</u> | <u><math>P_{C\text{-value}}</math></u> |
| kappa               | 0.997         | 0.090                                  |

Slope for C-value:  $0.264 \pm 0.154$
